# Supplementary material for: The Impact of Surgical Experience on Major Intraoperative Aneurysm Rupture and Their Consequences on Outcome: A Multivariate Analysis of 538 Microsurgical Clipping Cases
Source: PLoS One. 2016 Mar 22;11(3):e0151805. doi: 10.1371/journal.pone.0151805 (PMC4803230; doi:10.1371/journal.pone.0151805)
Supplement: S1 Dataset — (XLSX) [file pone.0151805.s001.xlsx]

## Sheet: Sheet1
no of aneurysm	Patient	gender	age	V.S.1=185+1169, 2=others,	present-Hemorrhage	present-P[eye movement palsy]	P-duration, days	Hunt	Fisher	GCS1ER	GCS2 pre-op	CT-SAH	CT-IVH	CT_ICH	CT_others	aneu Rt/Lt	A,ICA	MCA	ACA	PC=posterio circulation	size	Lobulated=daughter+lobulated	rebleeding1	rebleeding2	others	OP	OP day	temporal clip	temp clip1	temp clip2	temp clip3	intraop rupt	solution	outcome S	F/U period=months	GCS-1m	GCS-3m	GCS-1y	F/U CT-m	ct low den1	low den1 size	low den1 c/s	ct low den2	low den2size	low den2 c/s	others	recurrent A	P.S
1	1	f	69	2	y	n	n	2	3+4	15	15	y	y[2,3,a,4]	n	n	r	y	n	n		10=14		n	n	n	c	1		>20[24]	<10[3]	>20[26],10=15[13],<10[4],<10[9]	y-c-n	t	v					1d	n	n	n	n	n	n	retraction hematoma[rt frontal]	n
1	2	f	49	2	y	n	n	3	3	14	14	y	n	n	SDH, lt side, with midline shifting	l	y	n	n		<10	y	n	n	n	c	3		n	n	n	n	n	sd	26	11	11	14	1	lt basal ggl	moderate	c	lt temporal	moderate	s	n	n
1	3	f	72	2	n	y	365	0	0	15	15	n	n	n	n	r	y	n	n		<10		n	n	n	c	4		n	n	n	n	n	md	71	15			n	n	n	n	n	n	n	n	n
1	4	f	40	2	y	n	n	1	2	15	15	y	n	n	n	r	y	n	n		10=14		n	n	n	c	1		n	n	n	n	n	g
1	5	m	39	1	y	n	n	3	2+4	15	15	y	y	y	n		n	n	y		15=19	y	20	n	n	c	10		n	n	n	n	n	g	70	15	15	15	2	lt. basal gangl	small	s
1	6	f	51	2	y	n	n	4	3	3	11	y	n	n	hydrocephalus	r	y	n	n		<10	y	n	n	cns infection	c	1		10=15	n	n	y-d-d	t	g	13	13	15	15	3	rt frontal	small	s	rtbasal ggl and parietal	s	s	n	y	1st recurrent aneurysm was found 2 yrs later[930319] with CTA---1st coiling on 930324----recurrence again-----2nd coiling on 931021------recurrence again-------3rd coiling on 940616-----recurrence again-----4th coiling on 950112
1	7	f	46	2	y	n	n	3	2	14	14	y	n	n	n	l	n	y	n		<10		n	n	n	c	14		n	n	n	n	n	md	88	15	15	15	n	*	*	*	*	*	*	*	n
1	8	m	43	2	y	n	n	2	3	15	15	y	n	n	n		n	n	y		<10		n	n	n	c	1		>20	>20	>20	n	n	g	19	15	15	15	1
1	9	m	83	2	y	n	n	2	1	15	15	y	n	n	n	l	n	n	y		10=14	y	n	n	seizure, ich, sdh, sah]	c	7		<10[3'45"	<10[1']	<10[5'15"], <10[1'] <10[4'42"]	y-r-d	temporal clip	v	26	6	8	10	8	n	n	n	n	n	n	severe brain atrophy and hydrocephalus	n
1	10	f	40	1	y	n	n	2	2	15	15	y	n	n	n	r	y	n	n		<10	y	n	n	n	c	5		<10[1'5"]	n	n	n	n	g	29	15	15	15	n	*	*	*	*	*	*	*	n
1	11	m	58	1	n	n	n	0	0	15	15	n	n	n	n	l	y	n	n		>=30		n	n	n	c	*		n	n	n	n	n	g	30	15	15	15	n
1	12	f	53	2	y	n	n	1	2	15	15	y	n	n	n		n	n	y		10=14	y	n	n	n	c	19		n	n	n	n	n	g	52	15	15	15	n
1	13	f	53	1	y	n	n	4	3	6	6	y	n	n	n	l	n	n	y		<10		n	n	multiple and large area delate infarct	c	5		<10[40"]	<10[3'11"]	n	n	n	d	17d	3	3	3	2d	lt mca infarct	large	c	bifrontal base	moderate	c	n	n
1	14	m	72	2	y	n	n	3	2+4	9	14	y	y	y	n	r	n	y	n		15=19	y	n	n	n	c	4		n	n	n	n	n	md	2	15
1	15	f	48	2	n	y	2	0	0	15	15	n	n	n	n	l	y	n	n		10=14	y	n	n	n	c	3		n	n	n	n	n	g	84	15	15	15	n	*	*	*	*	*	*	*	n
1	16	m	56	2	y	n	n	1	1	15	15	n	n	n	mass, suprasellar		n	n	y		20=24		n	n	shunt infection	c	10		<10	<10	<10	n	n	g	15	15	15	15	n	*	*	*	*	*	*	*	n
1	18	m	60	1	n	n	n	0	0	15	15	n	n	n	mass, rt tempal	r	n	y	n		>=30		n	n	seizure	c+resection	6		<10	n	n	n	n	g		15	15	15	1d	n	n	n	n	n	n	n	n
1	19	f	57	2	y	n	n	4	3	6	6	y	n	n	n	l	n	n	y		10=14		n	n	n	c	4		n	n	n	n	n	sd		9		14	22	bil frontal
1	20	f	53	2	y	n	n	2	2	15	15	y	n	n	n	l	y	n	n		10=14		n	n	n	trapping	19		n	n	n	n	n	g	17	15	15	15	n	*	*	*	*	*	*	n	n
1	21	m	20	1	y	y	23	1	2+4	15	9	y	y[2,3,a,4]	n	n	r	y	n	n		10=14	y	1	4	n	c	1		10=15	10=15	20	y-d	c	g	15	15	15	15	2	rt.caudate	12	s	rt mca	large	c	n	y
1	22	f	58	2	y	n	n	2	3	15	13	y	n	y[rt frontal, inf]	hydrocephalus	r	y	n	n		10=14		n	n	n	c	13		<10	n	n	y-d-d	t	md		14	15	15	1	rt mca large infarct	large	c	n	n	n	n	n
1	23	f	49	2	y	n	n	1	2	15	15	y	n	n	n	r	y	n	n		<10	y	n	n	n	c	1		n	n	n	n	n	sd	4	10			4	int. capsucle	2x1x1.5	c	n	n	n	n	n
1	24	f	45	1	y	n	n	3	2	13	13	y	n	n	n		n	n	y		10=14		n	n	n	c	4		n	n	n	n	n	g	69	15	15	15	58	n	n	n	n	n	n	n	n
1	25	f	56	2	y	n	n	2	2+4	15	15	y	n	y	hydrocephalus	l	n	n	y		<10	y	n	n	n	c	14		n	n	n	n	n	g	2	14	15		y	n	n	n	n	n	n	n	n
2	25	f	56	2	*	*	*	*	*	15	15	*	*	*	*	l	n	n	y		<10		*	*	*	wrapping	14		n	n	n	n	n	g	*	*	*	*	*	n	n	n	n	n	n	n	n
1	26	m	72	1	y	n	n	1	1	15	15	n	n	n	n	l	y	n	n		10=14		n	n	n	c	21		n	n	n	n	n	g	48	15	15	15	48	l mca	large	c	n	n	n	r/o recurrent residural aneurysm	r/o recurrent residural aneurysm
1	27	f	60	2	y	n	n	3	3+4	10	10	y	n	y	n	r	n	y	n		15=19		n	n	n	c	2		n	n	n	n	n	g	15	15	15	15	4	l frontal	2	s	r parietal	2	s	n	n
1	28	m	78	2	y	n	n	3	3+4	8	8	y	y[2]	n	n		y	n	n		10=14		n	n	n	wrapping	1		n	n	n	n	n	d	1	3	3	3
1	29	m	45	2	y	y		4	3+4	6	6	y	y	n	n	r	y	n	n		10=14		n	n	n	wrapping	3		n	n	n	n	n	d	15d	3
1	30	f	61	2	y	n	n	2	1	15	15	n	n	n	n		n	n	y		<10		14	n	n	c	2		n	n	n	n	n	v	4	10	10		3	lt ACA inf	2x2x2.5	c	n	n	n	n	n
1	31	m	80	2	y	n	n	2	3+4	6	6	y	y[2,3,a,4]	n	n		n	n	y		10=14		n	n	n	c	1		n	n	n	n	n	d	12d					r mca infarction large	large	c	n	n	n	n	n
1	32	f	64	1	y	n	n	2	3	14	14	y	n	n	n		y	n	n	n	<10		n	n	n	c	5	y	y	n	n	n	n	g	66	15	15	15	n	n	n	n	n	n	n	n
1	33	f	45	2	y	y		5	2	14	14	y	n	n	n	l	y	n	n	n	<10	y	n	n	n	c	2	n	n	n	n	n	n	g	2	15	15	15	n	*	*	*	*	*	*	*	residual aneurysm noted 6m later
1	34	m	66	2	y	n	n	4	3+4	8	8	y	y[2,3]	n	n	l	n	n	y	n	10=14		n	n	n	c	2	n	n	n	n	n	n	v	89	8	10	11	n	n	n	n	n	n	n	n	n
1	35	m	64	1	n	n	n	0	0	15	15	n	n	n	AVM[rt post temporal]	r	n	y	n	n	10=14		n	n	n	c	*	y	<10	<10	n	y-d-d	t	g	84	15	15	15	n	*	*	*	*	*	*	n	n	associated with rt post. Temporal AVM which was symtomatic and was operated on 2m previously
1	36	m	35	1	n	y[CN3,4,6 paresis]	60	0	0	15	15	n	n	n	n	l	y	n	n		>=30		n	n	n	trapping	75		n	n	n	n	n	g	150	15	15	15	n	*	*	*	*	*	*	*	n	1.cross compression:ok 2.no bypass done
1	37	m	38	1	y	n	n	1	3	15	15	y	n	n	n		n	n	y		<10		n	n	n	c	12		n	n	n	n	n	g	52	15	15	15	n
1	38	f	76	2	y	n	n	4	3+4	7	7	y	n	y	n	r	y	n	n		20=24	y	n	n	n	c	2		n	n	n	n	n	v	16	6	6	6	1/2.	r hemisphere	large	c	n	n	n	hydro	n
1	39	f	69	2	y	n	n	2	2	15	15	y	n	n	n		y	n	n		<10				seizure	c	10					n	n	v	12	8	8	8	1	n	n	n	n	n	n	1.hydro,2.CNS inf	n
1	40	f	59	2	y	n	n	2	2	14	15	y	n	n	n	l	n	n	y		<10		n	n	terson syndrome withvitrous hemorrhage	c	1		n	n	n	n	n	g	12	15	15	15	12	lt caudate nuclei	moderate	s	lt striatocapsular and right putamen	small	subclinical	n	y[angio 18d post op showed residual aneurysm beneath the clip and about 5*5mm and project upward
1	41	f	58	1	y	n	n	2	3	15	15	y	n	n	n	l	y	n	n		10=14		n	n	n	c	5		n	n	n	n	n	g	89	15	15	15	y	n	n	n	n	n	n	n	n
1	42	f	44	2	n	n	n	0	0	15	15	n	n	n	infarct, lt hemispheric	l	n	n	y		<10		n	n	n	c	*		<10[9']	n	n	n	n	g	10	15	15	15	n	*	*	*	*	*	*	*	n
1	43	f	56	1	y	n	n	2	1	15	15	n	n	n	n	l	n	y	n		25=29		n	n	n	c	60		10=15	n	n	y-c-n	c+t	md	54	15	15	15	3	lt frontal	moderate	s	n	n	n	n	n
1	44	m	35	1	y	n	n	1	1	15	15	n	n	n	n	?	y	n	n		20=24		n	n	n	trapping	9		n	n	n	n	n	g	120	15	15	15	n	*	*	*	*	*	*	n	n
1	45	m	60	2	y	n	n	3	3+4	13	13	y	n	y	n		n	n	y		<10		n	n	n	c	2		<10	n	n	y-d-n	t	md	49	14	15	15	3	lt ACA	moderate	s	n	n	n	hydrocephalus	n
1	46	f	44	1	y	n	n	2	2	14	14	y	n	n	n		n	n	y		10=14		n	n	n	c	19		<10	n	n	n	n	g	96	15	15	15	n	n	n	n	n	n	n	n	n
1	47	m	40	1	y	n	n	2	1+4	14	14	y	y	n	n		n	n	y		10=14		n	n	n	c	42		<10	<10	n	n	n	md	88	15	15	15	1	lt. caudate	1x1.5x1	s	n	n	n	n	n
1	48	m	55	1	y	n	n	3	3+4	13	13	y	y[2,3,a,4]	y	n		n	n	y		10=14	y	n	n	n	wrapping	2		n	n	n	n	n	sd	19	13	13	14	6	lt. frontal	large	c	lt. MCA	large	c	n	n
1	49	f	72	1	y	y	5	2	2	14	15	y	n	n	n		y	n	n		<10		n	n	n	c	8	n	n	n	n	n	n	g	12	15	15	15									n	1.Ipsilat. Cervical ICA occlusion.
1	50	f	74	2	n	n	n	0	0	15	15	n	n	n	brain atrophy		n	n	y		<10		n	n	n	c	*	n	n	n	n	n	n	md	3	12	14	15
1	51	f	72	2	y	n	n	3	2+4	11	11	y	y	n	n	l	n	n	y		<10		n	n	n	c	8	n	n	n	n	n	n	g					1	lt putamen	s	s	lt corona radiata	s	s	Hydrocephalus	n
1	52	m	37	2	y	n	n	1	2	15	15	y	n	n	n		n	n	y		<10		n	n	n	c	9		<10	<10	<10	n	n	g	83	15	15	15	n	*	*	*	*	*	*	*	n
1	53	m	68	2	y	n	n	3	3+4	12	12	y	y[4]	n	n	r	y	n	n		10=14		n	n	n	c	7		n	n	n	y-c-n	clip+suction	d[ESRD}	16d	3	3	3	1	rt frontal	small[1.5*1.5*2]	s	n	n	n	n	n
1	54	f	62	2	y	n	n	3	3	12	12	y	n	n	n	l	y	n	n		<10		n	n	n	c	1		n	n	n	n	n	md	52	10	14	15	8	rt. frontal	2x2x3	s	n	n	n	n	n
1	55	m	44	1	y	n	n	2	2	15	15	y	n	n	n		n	n	y		<10	y	n	n	n	c	2		n	n	n	n	n	g	1.06	15	15	15
1	56	m	63	1	y	n	n	2	3	13	13	y	n	n	n		n	n	y		<10		n	n	n	c	7		<10	n	n	n	n	g	24	15	15	15
1	57	f	76	2	y	n	n	4	2	8	8	y	n	n	n	l	y	n	n		10=14		n	n	n	c	9		n	n	n	n	n	g	30	13	13	15	1//4	n	n	n	n	n	n	n	n
1	58	m	59	1	y	n	n	2	2	15	15	y	n	n	n		n	n	y		<10		n	n	n	c	4		<10	n	n	n	n	g	83	15	15	15	n	*	*	*	*	*	*	n	n
1	59	m	59	2	y	n	n	4	2+4	6	9	y	y[2,3,a,4]	n	n	l	n	n	n	y	<10		n	n	n	c	15		n	n	n	n	n	md	21	14	14	15	3	lt. PCA	large	c	n	n	n	n	n
1	60	f	53	2	y	n	n	4	3	7	7	y	n	n	hydrocephalus	l	y	n	n		<10	y	n	n	n	c	2		n	n	n	n	n	g	6	13	15		y[1m]	n	n	n	n	n	n	hydrocephalus	n
1	61	f	72	2	y	n	n	1	1	15	15	y	n	n	n	r	y	n	n		10=14	y	n	n	n	c	6		n	n	n	n	n	g	55	15	15	15	n	*	*	*	*	*	*	*	n
1	62	f	84	2	y	n	n	4	3+4	12	6	y	n	y[rt temporal, large]	n	r	n	y	n		<10	y	y	n	n	c	1		y[>10']	n	n	y-r-d	n	d	3	3	3	3	n	*	*	*	*	*	*	*	n
2	62	f	84	2	y	n	n	4	3+4	12	6	y	n	y[rt temporal, large]	n	r	y	n	n		<10	y	y	n	n	c	1		y[>10']	n	n	y-c-n	n	d	3	3	3	3	n	*	*	*	*	*	*	*	n
1	63	m	70	2	y	n	n	3	2+4	14	14	y	n	y	n	l	n	y	n		10=14	y	n	n	n	c	90		10	n	n	n	n	g	22	15	15	15
1	64	m	67	2	y	n	n	2	2	15	15	y	n	n	n	l	y	n	n		<10		n	n	n	c	7		n	n	n	n	n	g	2	14	15			n	n	n	n	n	n	n	n
1	65	f	61	1	y	n	n	2	3	15	15	y	n	n	n	l	n	y	n		10=14	y	n	n	lt mca large infarct	c	2		<10[2'9"]	n	n	n	n	d	14d	3	3	3	3d	lt mca infarct	large	c	n	n	n	n	n
2	65	f	61	1	*	*	*	*	*	15	15	*	*	*	*	l	n	n	y		<10	y	*	*	*	c	*		n	n	n	n	n	d	14d	3	3	3	3d	lt mca infarct	large	c	n	n	n	n	n
1	66	f	62	1	y	n	n	2	2+4	13	13	y	y	y[rt frontal]	hydrocephalus	r	n	n	y		<10	y	n	n	n	c	2		<10[2-3]	<10[2-3]	<10[2-3],<10[7-8]	n	n	g	2	15	15		n	*	*	*	*	*	*	*	n
1	67	f	70	2	n	n	n	0	0	15	15	n	n	n	n	l	n	y	n		<10		n	n	n	c	*		y	n	n	y-d	t	sd	72	8	8	8	n	n	n	n	n	n	n	n	n
1	68	f	50	2	y	n	n	1	3+4	15	15	y	n	y	n	r	n	y	n		10=14	y	n	n	n	c	1		n	n	n	n	n	md	19	14	15	15
1	69	f	67	1	n	y	2	0	0	15	15	n	n	n	n	r	y	n	n		10=14	y	n	n	n	c	1		n	n	n	n	n	g	69	15	15	15	1	n	n	n	n	n	n	n	n
1	70	m	65	1	y	n	n	3	3+4	7	14	y	n	y	n	r	y	n	n		<10		n	n	n	wrapping	11		n	n	n	n	n	g	24	15	15	15	n
1	71	f	76	2	y	n	n	4	3+4	6	6	y	n	y	n	l	n	n	y		10=14		n	n	n	c	1		n	n	n	n	n	sd	28	9	10	12	21	l frontal	moderate	s	n	n	n	n	n
1	72	f	50	2	y	n	n	2	1	15	15	n	n	n	n	l	y	n	n		<10		n	n	n	c	5		n	n	n	n	n	g	63	15	15	15
1	74	f	73	2	y	n	n	2	3	15	15	y	n	n	hydrocephalus	r	y	n	n		<10	y	n	n	1.cns infection2.seizure	c	2		<10	n	n	n	n	sd	24	10	13	13	24	rt frontoparietal	large	c	1.rt cerebellum 2.lt frontal	moderate	s	repeated hydro	n
1	75	f	51	1	y	y	6	1	2	15	15	y	n	n	n	r	y	n	n		<10	y	n	n	n	c	6		<10	n	n	n	n	g		15				*	*	*	*	*	*	n	n
1	76	f	54	2	y	n	n	3	3+4	7	7	y	n	y	n	r	y	n	n		10=14		n	n	n	c	1		10	n	n	n	n	g		12	14	15	2	r temp infarction	10	s	n	n	n	n	n
1	77	f	50	2	y	n	n	4	3+4	14	6	y	y	n	hydrocephalus	l	n	n	n	y	<10		n	n	cns infection	c	16		n	n	n	n	n	d	2	11	3	3	y[0.3]	n	n	n	n	n	n	hydro, ivh	n
1	78	m	64	1	y	n	n	5[ after rebleeding] 3[post 1st bleeding]	3+4[ after rebbleeding]1[post 1st bleeding]	12	6	y[after rebleeding]	y[after rebleeding]	y[after rebleeding]	hydrocephalus	r	n	n	y		10=14	y	14	n	n	c	1		10	n	n	y-d-d	t	d	20d	3	3	3	retraction hematoma	n	n	n	n	n	n	n	n
1	79	f	78	2	y	y	10	4	2+4	8	8	y	y[4]	n	n	r	y	n	n		15=19	y	10	n	n	c	1		>20	n	n	y-c-n	clip	d	7d	3	3	3	n	*	*	*	*	*	*	n	n
1	80	f	66	2	y	n	n	3	3	12	12	y	n	n	n	r	y	n	n		10=14		n	n	n	c	10		n	n	n	n	n	g		15	15	15	y
2	80	f	68	2	y	n	n	4	3	7	7	y	n	n	n	l	y	n	n		10=14		n	n	s	c	1		n	n	n	n	n	v	38	10	10	11	y
1	81	f	61	1	y	n	n	2	2+4	14	14	y	n	y	n	l	n	n	y		<10		n	n	n	c	10		n	n	n	n	n	g	72	14	15	15	n	n	n	n	n	n	n	n	n
1	82	f	38	1	y	n	n	1	1	15	15	n	n	n	n	l	y	n	n		10=14		n	n	s, Todd's paralysis	c	8		n	n	n	n	n	g		15	15	15	24	lt corona radiata	small[1*1]	c[may be the reason of sudden onset of rt UE numbness and slurred speech before op	n	n	n	n	n
1	83	f	45	2	n	n	n	0	0	15	15	n	n	n	n	r	y	n	n		<10		n	n	n	c	7		n	n	n	n	n	g	48	15	15	15	15	n	*	*	*	*	*	n	n
1	84	f	60	2	y	n	n	4	3	7	8	y	n	n	n		n	n	y		<10	y	n	n	n	c	2		<10	n	n	y-d	n	sd	13	7			1	L't ACA	large	c	n	n	n	n	n
1	85	f	51	2	y	n	n	3	3+4	13	7	y	y[2,3,a,4]	n	n	l	y	n	n		<10		11	n	n	c	11		n	n	n	y-d-d	t+down MAP	md	49	15	15	15	7	lt frontal	moderate	c	n	n	n	intraop rupture-residual aneurysm-reopen-intraop rupture	residual
1	86	f	76	2	y	n	n	2	2+4	13	13	y	y	n	hydrocephalus	l	n	n	y		<10		n	n	seizure	c	1		n	n	n	n	n	md	3	13	14
1	87	m	40	2	y	n	n	2	1	15	15	n	n	n	n	r	n	y	n		10=14		n	n	n	c	3		n	n	n	n	n	md	63	11	11	11	7	n	n	n	n	n	n	n	n
1	88	f	72	2	y	n	n	4	3+4	6	7	y	y[2]	n	n	l	n	y	n		<10		n	n	n	c	2		<10	n	n	n	n	g	5	15	15	n	n	n	n	n	n	n	n	n	n
1	89	f	46	2	y	n	n	2	2	15	15	y	n	n	hydrocephalus	l	n	n	y		<10		n	n	n	c	2		<10[4']	n	n	y-d-d	temporal clip	g	29	14	15	15	7days	n	n	n	n	n	n	n	n
1	90	m	85	2	y	n	n	1	2	15	15	y	n	n	n	l	n	y	n		<10		n	n	n	c	3		<10	n	n	n	n	g	15	12	14	15	n	*	*	*	*	*	*	*	n
2	90	m	85	2	*	n	n	*	*	15	15	*	*	*	*	l	n	n	y		10=14		*	*	*	c	*		10	n	n	n	n	g	15	12	14	15	n	*	*	*	*	*	*	*	n
1	91	f	52	2	y	n	n	2	2+4	14	14	y	y	n	n	r	y	n	n		10=14	y	n	n	n	c	1		n	n	n	n	n	g		15	15	15	1	rt frontotemporal	s-m	s	n	n	n	n	n
2	91	f	52	2	*	*	*	*	*	15	15	*	*	*	*	l	y	n	n		<10		*	*	*	c	*		n	n	n	n	n	g		15	15	15	n	*	*	*	*	*	*	*	n	1.Incidental finding of lt outer third sphenoid ridge meningioma.
1	92	f	32	2	y	n	n	2	3+4	15	15	y	y[4]	y[rt frontal, inf-lat]	n	r	n	y	n		15=19	y	n	n	n	c	4		<10	n	n	y-r-d	t	g	55	15	15	15	n	*	*	*	*	*	*	*	n
1	93	m	61	2	y	n	n	2	2	15	15	y	n	n	n		n	n	y		<10	y	n	n	n	c	6		<10	n	n	y-d-d	c	g	5	15	15	15	1	n	n	n	n	n	n	n	n
1	94	f	73	2	y	n	n	4	3+4	7	7	y	n	y[rt temporal]	n	r	y	n	n		<10		n	n	n	c	2		n	n	n	y-d-n	large bore suction	sd	22	11	14	15	10	rt MCA	large	c	n	n	n	n	n
1	95	m	56	1	y	n	n	2	3	15	15	y	n	n	n		n	n	y		10=14	y	n	n	n	c	13		n	n	n	n	n	g	24	11	14	15	n	*	*	*	*	*	*	*	n
1	96	f	66	1	y	n	n	3	3+4	4	12	y	y	n	hydrocephalus	r	n	n	n	y	15=19	y	n	n	n	c+thrombectomy	14		<10	n	n	n	n	g		12	14	15	n	*	*	*	*	*	*	*	n
1	97	f	67	2	y	n	n	2	3	15	15	y	n	n	hydrocephalus	l	y	n	n		10=14	y	n	n	seizure	c	2		n	n	n	n	n	g	11	15	15	15	1	lt temporal	moderate	s	rt basal gll	small	s	n	n
1	98	m	47	1	y	n	n	2	3	15	15	y	n	n	n	r	y	n	n		10=14		n	n	n	p+c	4		50[proximal ICA control]	n	n	y-c-n	prolene repair neck with proximal ICA control]	d	5d	3	3	3	n	right PCA , left MCA	Large	c	n	n	n	n	n
1	99	f	78	2	y	n	n	3	3	12	12	y	n	n	hydrocephalus	l	y	n	n		<10	y	n	n	n	c	1		n	n	n	n	n	v	5	11	11	4[from 5th month]	4m	n	n	n	n	n	n	contralat chronic SDH found4months later	n
1	100	m	66	1	y	n	n	4	3+4	7	7	y	n	y	hydrocephalus	r	n	n	y		<10		n	n	n	c	3		<10	n	n	n	n	d->ARDS	19d	3
1	101	f	44	2	y	n	n	2	2	15	15	y	n	n	n	l	y	n	n		10=14		n	n	n	c	1		n	n	n	n	n	g	28	15	15	15	n	*	*	*	*	*	*	*	n
1	102	f	65	2	y	n	n	2	3	15	15	y	n	n	n	r	n	y	n		10=14	y	n	n	n	c	2		y	n	n	n	n	md	4.24	15	15	15	n	*	*	*	*	*	*	*	n
1	103	f	49	1	y	n	n	2	2+4	15	15	y	y	n	n		n	n	n	y	15=19		n	n	n	wrapping	16		n	n	n	n	n	g	2	15	15	15	n	*	*	*	*	*	*	*	n
1	104	f	62	2	y	n	n	2	2	15	15	y	n	n	n	l	y	n	n		10=14	y	n	n	n	c	5		n	n	n	n	n	g	70	15			n	*	*	*	*	*	*	n	n
1	105	m	78	1	n	n	n	0	0	15	15	n	n	n	n	l	y	n	n		>=30		n	n	n	c	16		<10	n	n	n	n	sd
1	106	f	41	2	y	n	n	1	2	15	15	y	n	n	n	r	y	n	n		10=14		n	n	n	c	9		n	n	n	n	n	g	10	15	15		n	*	*	*	*	*	*	n	n
2	106	f	41	2	*	*	*	*	*	15	15	*	*	*	*	r	n	n	y		<10		n	n	n	c	9		n	n	n	n	n	g	10	15	15		n	*	*	*	*	*	*	n	n
1	107	f	70	2	y	n	n	2	3+4	14	14	y	y[2]	n	hydrocephalus	r	y	n	n		10=14	y	n	n	n	c	2		11	n	n	n	t	d	13d	3	3	3	1d	rt ICA	large	c	rt PCA	large	c	n	n
1	108	f	66	2	y	n	n	2	3	15	15	y	n	n	hydrocephalus	l	y	n	n		10=14		n	n	n	c	2		n	n	n	n	n	g	7	15	15		n	*	*	*	*	*	*	n	n
1	109	f	66	2	y	n	n	2	2	14	14	y	n	n	n	l	y	n	n		10=14	y	n	n	n	c	4		n	n	n	n	n	sd	56	7	7	7	n	*	*	*	*	*	*	n	n
1	110	f	46	2	y	n	n	2	3+4	11	11	y	y[2,4]	n	n	l	n	n	y		10=14	y	n	n	n	c	3		n	n	n	n	n	g	18	14	15	15	4	n	n	n	n	n	n	n	n
1	111	f	70	1	y	n	n	4	3	7	7	y	n	n	n	l	y	n	n		<10		n	n	n	c	9		n	n	n	n	n	v	67	7	4	4
1	112	f	61	1	y	n	n	3	3	6	10	y	n	n	n	r	y	n	n		10=14		n	n	n	wrapping	7		n	n	n	n	n	g	48	13	14	15	n	*	*	*	*	*	*	n	n
1	114	f	51	2	y	n	n	2	2	15	15	y	n	n	n	r	n	n	n	y	10=14		n	n	n	coaga+occlusion	2		n	n	n	n	n	g	5	15	15		1//2	n	n	n	n	n	n	n	n
1	115	f	63	1	y	n	n	2	2	15	15	y	n	n	hydrocephalus	r	n	n	y		<10		n	n	n	c	4		n	n	n	n	n	g	96	14	15	15	n	*	*	*	*	*	*	*	y	Recurrent a-com aneurysm
1[recurrent]	116	f	71	1	y	n	n	2	2+4	13	13	y	y	n	hydrocephalus	r	n	n	y		<10		n	n	n	c	1		n	n	n	n	n	md	29	13	14	15	4	rt temporal	moderate	subclinical	n	n	n	n	n
1	117	f	65	2	y	n	n	2	2	14	14	y	n	n	n	l	y	n	n		15=19	y	n	n	n	c	5		n	n	n	n	n	g	30m	15	15	15	12d	n	n	n	n	n	n	n	n
1	118	m	42	1	y	n	n	2	3	15	15	y	n	n	n		n	n	y		<10		n	n	n	c	3		<10	n	n	n	n	g	51	15	15	15	n	*	*	*	*	*	*	n	n
1	120	m	62	1	y	n	n	1	1	15	15	y	n	n	n		n	n	y		<10		n	n	n	c	11		<10	n	n	n	n	g	72	13	14	15		left frontal	small	s	n	n	n	n	n
1	121	f	61	1	y	n	n	2	2+4	14	14	y	y	n	n	r	n	y	n		10=14		n	n	n	c	1		n	n	n	n	n	g	29	15	15	15	12	r tempo infarction	15	s	n	n	n	n	n
1	122	f	40	2	y	y	1	2	3	15	15	y	n	n	n	r	y	n	n		10=14	y	n	n	n	c	1		n	n	n	n	n	g	1	15	15	15	n	*	*	*	*	*	*	*	n
2	122	f	40	2	*	*	*	*	*	15	15	*	*	*	*	l	y	n	n		<10		*	*	*	c	*		n	n	n	n	n	g		15	15	15	n	*	*	*	*	*	*	*	n
1	123	m	59	1	y	n	n	3	3	13	13	y	n	n	n	l	y	n	n		<10		n	n	n	c	1		n	n	n	n	n	g	86	15	15	15	16	rt. frontal	small	s	n	n	n	n	n
1	124	f	58	2	y	n	n	3	3	11	11	y	n	n	n	r	y	n	n		<10	y	n	n	n	c	1		n	n	n	n	n	g	65	15	15	15	n	*	*	*	*	*	*	n	n
1	125	f	53	2	y	n	n	3	2+4	10	15	y	y[2,4]	n	n	l	n	n	n	y	10=14		n	n	n	wrapping	5		y	n	n	n	n	g	84	15
1	126	f	56	1	y	n	n	2	3	15	15	y	n	n	n	l	n	n	y		10=14	y	n	n	n	c	10		n	n	n	n	n	g	120	15	15	15	n	*	*	*	*	*	*	n	n
1	127	f	60	1	y	n	n	3	2+4	3	14	y	n	y	n	r	n	y	n		10=14	y	7	n	n	c	7		n	n	n	n	n	md	87	15
1	128	f	59	2	y	n	n	3	1	15	8	y	n	n	n		n	n	n	y	<10		28	30	n	c	1		n	n	n	n	n	d	1	3	3	3	n	*	*	*	*	*	*	n	n
1	129	m	53	1	n	n	n	0	0	15	15	n	n	n	n	r	y	n	n		<10		n	n	n	c	30		n	n	n	n	n	g	84	15	15	15	n
1	130	f	44	2	y	n	n	1	2	15	15	y	n	n	n	l	y	n	n		25=29		n	n	n	wrapping	45		n	n	n	n	n	d	1	3
1	131	m	61	1	y	n	n	2	2+4	15	15	y	y	n	n	l	n	n	y		<10		n	n	n	c	21		n	n	n	n	n	g	87	15	15	15	n	*	*	*	*	*	*	n	n
1	132	m	52	2	y	n	n	1	2+4	15	15	y	y[2,3]	y	n	r	n	y	n		15=19	y	n	n	n	c	21		<10	n	n	n	n	g	87	15	15	15	n	*	*	*	*	*	*	n	n
1	133	f	47	1	n	y	5	0	0	15	15	n	n	n	n	r	y	n	n		10=14	y	*	*	*	c	60		n	n	n	n	*	g	2m	15												true p-com aneurysm close to ICA and P-com art. Juction
1	134	f	42	1	y	n	n	3	3+4	12	12	y	y[2,3,a,4]	n	hydrocephalus		n	n	y		10=14	y	n	n	n	c	3		n	n	n	n	n	d	11d	3	3	3	n	*	*	*	*	*	*	*	n
1	135	f	60	2	y	n	n	2	2+4	15	15	y	y[2,3]	n	n	l	n	n	y		10=14		n	n	n	c	16		n	n	n	n	n	g	92	14	15	15	n	*	*	*	*	*	*	n	n
1	136	m	49	1	y	n	n	4	3	15	7	y	n	n	n	r	n	y	n		10=14		2	n	n	c	1		n	n	n	n	n	d	9d	3	n	n	n	*	*	*	*	*	*	n	n
1	137	f	60	2	y	n	n	3	3	14	15	y	n	n	n		n	n	y		<10	y	n	n	n	c	4		y	n	n	n	n	g	1	15
1	138	f	71	2	y	n	n	2	2	13	13	y	n	n	n	r	y	n	n		<10		n	n	n	c+p+ec-ic bypass	3		n	n	n	y-c-n	c+t+hypotension+ec-ic bypass	d	5d	3	3	3	n	*	*	*	*	*	*	n	n
1	139	f	73	1	y	n	n	3	3	13	13	y	n	n	n	l	y	n	n		<10		7	n	n	c	1		n	n	n	n	n	g	85	15	15	15	n	*	*	*	*	*	*	*	n
1	140	m	44	2	y	n	n	4	1+4	10	6	n	y	n	n		n	n	y		15=19		3	11	n	c	1		n	n	n	n	n	md	83	14	14	14	12	lt frontal		c	n	n	n	n	n
1	141	f	63	2	y	n	n	3	2	10	10	y	n	n	n	l	y	n	n		10=14		n	n	n	c	1		n	n	n	n	n	md	21	12	14	15	n	*	*	*	*	*	*	n	n
1	142	f	65	2	y	n	n	3	3	12	12	y	n	n	n	l	n	n	y		<10		n	n	n	c	7		y	n	n	n	n	g	88	14	15	15	n	*	*	*	*	*	*	n	n
1	143	f	50	2	y	n	n	2	2	15	15	y	y	n	hydrocephalus	r	y	n	n		<10[larger]	y	n	n	lt hemiparesis postop	c	1		n	n	n	n	n	md	6m	15	15	15	8d	rt int capsule infarct	moderate	glinical	n	n	n	n	n	postop angio showed rt ant choroid art occlusion
2	143	f	50	2	*	*	*	*	*	15	15	*	*	*	*	r	y	n	n		<10		*	*	*	c	*		n	n	n	n	n	md	*	*	*	*	8d	n	n	n	n	n	n	n	n
1	144	f	43	1	y	n	n	4	3	8	8	y	n	n	n	r	n	y	n		15=19		n	n	n	c	1		<10[4'40"]	n	n	n	n	g	25m	15	15	15	n	*	*	*	*	*	*	*	n	terson syndrome noted 5dyas postop--no op
1	145	m	44	1	y	n	n	2	2	14	14	y	n	n	n		n	n	y		<10		n	n	n	c	6		10=15	10=15	n	n	n	g	88	15	15	15	n	*	*	*	*	*	*	n	n
1	146	m	65	1	y	n	n	3	3+4	13	13	y	y[2,3,a,4]	n	n	l	y	n	n		<10		n	n	n	wrapping	2		n	n	n	n	n	d	1	12	12		n	*	*	*	*	*	*	n	n
1	147	m	47	2	y	n	n	2	3+4	15	15	y	n	y	n	l	n	y	n		10=14		n	n	n	c	45		n	n	n	n	n	g	38	15	15	15	n	*	*	*	*	*	*	n	n
1	148	m	64	1	y	n	n	3	3+4	15	15	y	y[2]	n	n		n	n	n	y	<10		n	n	n	c	32		n	n	n	n	n	md	10	15	15	15	10	n	n	n	n	n	n	n	n
1	149	m	45	1	y	n	n	2	2	15	15	y	n	n	n		n	n	y		<10	y	n	n	n	c	3		n	n	n	n	n	g		15	15	15	n	*	*	*	*	*	*	n	n
1	150	m	33	2	y	n	n	3	1+4	14	14	y	n	y	n	l	n	y	n		10=14	y	n	n	n	c	7		n	n	n	n	n	g	30	15	15	15	n	*	*	*	*	*	*	n	n
1	151	f	64	2	y	n	n	2	3	15	15	y	n	n	n	l	y	n	n		<10		n	n	n	wrapping	2		n	n	n	n	n	sd	9	10	12	12	y	L't frontal	moderate	s	n	n	n	n	n
1	152	m	68	2	y	n	n	4	3+4	6	6	y	y[2,3,a,4]	n	n	l	y	n	n		20=24		n	n	n	trapping	1		n	n	n	n	n	v	19	6	6		2	l mca	large	c	n	n	n	n	n
1	153	f	42	2	y	n	n	2	2	15	15	y	n	n	hydrocephalus	l	n	y	n		<10		n	n	n	c	2		<10[1'30'']	n	n	n	n	g	2	15	15		n	*	*	*	*	*	*	*	n
1	154	f	57	2	y	n	n	4	3	9	9	y	n	n	n	l	y	n	n		10=14	y	n	n	s	c	1		n	n	n	n	n	sd	1				1//2	l basal ganglar	5.6	c	l frontal	moderate	c	n	n
1	155	m	37	1	y	n	n	2	2	14	14	y	n	n	n	l	y	n	n		<10	y	n	n	n	c	2		n	n	n	n	n	g		15	15	15	y	n	n	n	n	n	n	n	n	1.Developed lt MCA aneurysm yrs later.
1	156	m	47	1	y	n	n	2	2	14	14	y	n	n	n	l	n	y	n		<10		n	n	n	c	4		n	n	n	n	n	g		15	15	15	y	lt frontal	moderate	c[aphasia]	n	n	n	n	n
1	158	m	80	1	y	n	n	4	3+4	8	8	y	n	y, rt temporal	hydrocephalus	r	y	n	n		10=14	y	n	n	n	c	2		<10[1'8"]	n	n	n	n	g	30m	14	15	15	n	*	*	*	*	*	*	*	n
1	159	m	39	2	y	n	n	2	2	15	15	y	n	n	n	r	n	y	n		<10		n	n	n	c	4		n	n	n	n	n	g	53	15	15	15	n	*	*	*	*	*	*	*	n
1	160	m	69	1	y	n	n	3	3+4	11	11	y	n	y[rt temporal]	n	r	n	y	n		15=19		n	n	n	c	18		n	n	n	n	n	g	70	15	15	15	n	*	*	*	*	*	*	*	n
1	161	m	41	1	y	n	n	3	3	13	13	y	n	n	n	r	n	n	y		<10		n	n	n	c	16		n	n	n	n	n	g		15	15	15	n	*	*	*	*	*	*	*	n
1	162	m	68	2	y	n	n	1	1	15	15	y	n	n	n	r	n	n	y		<10		n	n	n	c	1		n	n	n	n	n	g	1	15	15	15	n	*	*	*	*	*	*	*	n
1	163	m	46	2	y	n	n	1	2	15	15	y	n	n	n	r	n	y	n		<10		2	n	n	c	4		n	n	n	n	n	g	30	15	15	15	n	*	*	*	*	*	*	*	n
1	164	f	78	1	n	n	n	0	0	15	15	n	n	n	n	r	n	y	n		15=19	y	n	n	n	c	25		n	n	n	n	n	g	26	15	15	15	n	*	*	*	*	*	*	*	n
1	165	f	68	1	y	n	n	2	3	15	15	y	n	n	n	l	y	n	n		<10		n	n	n	c	1		n	n	n	n	n	md	49	14	15	15	n	*	*	*	*	*	*	*	n
1	166	m	53	2	y	n	n	2	2	15	15	y	n	n	n	r	n	n	y		10=14		n	n	n	c	12		n	n	n	n	n	g	18	15	15	15	1//4	r caudate nuclei	1.47	s	n	n	n	n	n
1	167	f	52	1	y	n	n	3	3	3	14	y	n	n	n	r	y	n	n		10=14	y	n	n	n	c	4		10	n	n	n	n	g	18	14	15	15	1	r basal ganglar	0.75	s	n	n	n	n	n
1	168	f	67	2	y	n	n	2	3+4	15	15	y	y[3]	n	n	r	y	n	n		<10		n	n	n	c	2		n	n	n	n	n	g	3	15		n	n	*	*	*	*	*	*	*	n
2	168	f	67	2	*	*	*	*	*	15	15	*	*	*	*	l	y	n	n		<10		n	n	n	c	58		<10	n	n	n	n	g				n	n	*	*	*	*	*	*	*	n
1	169	f	72	2	y	n	n	4	2+4	7	7	y	y	n	n	l	n	y	n		10=14		n	n	n	c	10		n	n	n	n	n	md	5	13	14	15	n	*	*	*	*	*	*	*	n
1	170	f	47	2	y	n	n	2	2	15	15	y	n	n	n	l	y	n	n		<10	y	n	n	n	c	8		n	n	n	n	n	g	30m	14	15	15	n	*	*	*	*	*	*	*	n
1	171	m	68	2	y	n	n	2	2	14	15	y	n	n	n	r	n	n	y		<10		n	n	n	c	3		n	n	n	n	n	g	12	15	15	15	n	*	*	*	*	*	*	*	n
1	172	f	70	1	y	n	n	2	2	15	15	y	n	n	n	r	y	n	n		<10	y	n	n	n	c	7		n	n	n	n	n	g	81	15	15	15	24	rt.basal g	3x1x4	s	rt.frontal	small	s	n	y
1	173	m	68	2	y	n	n	2	2	15	15	y	n	n	n		n	n	y		15=19		n	n	n	c	5		n	n	n	n	n	d-PPU	6	15	15
1	174	f	74	2	y	n	n	1	2	15	15	y	n	n	n	r	n	y	n		15=19	y	n	n	n	c	11		n	n	n	n	n	g	2	15	15	15	n	*	*	*	*	*	*	*	n
1	175	f	33	2	y	y		3	3	14	14	y	n	n	n	l	y	n	n		10=14		n	n	n	c	4		n	n	n	n	n	v	72	7	7	7	5	rt,mca pca and water shude area	3*2*3	s	n	n	n	n	n
1	176	f	67	2	y	n	n	2	2	15	15	y	n	n	n	l	y	n	n		<10	y	n	n	n	c	2		n	n	n	n	n	sd	2	14	14		y[0.5]	rt int capsule infarct	s	c	n	n	n	n	n
2	176	f	67	2	*	*	*	*	*	15	15	*	*	*	*	r	y	n	n		10=14		*	*	*	c	*		n	n	n	n	n	sd	2	14	14		y[0.5]	rt int capsule infarct	s	c	n	n	n	n	n
1	177	f	67	1	n	y	33	0	0	15	15	n	n	n	n	l	y	n	n		<10		n	n	n	c	30		n	n	n	n	n	g	12	15	15	15
1	178	f	73	1	n	y		0	0	15	15	n	n	n	n	r	y	n	n		15=19		n	n	n	c	18		n	n	n	n	n	g	84	15	15	15
1	179	m	64	2	y	n	n	3	3+4	10	9	y	y[2,3,a,4]	n	n	l	n	n	y		10=14		1	n	n	c	11		n	n	n	n	n	g	77	11	14	15	n	*	*	*	*	*	*	n	n
1	180	m	50	1	y	n	n	3	3	11	11	y	n	n	n		n	n	y		<10		n	n	n	c	18		n	n	n	n	n	g	76	15	15	15
1	181	m	62	2	y	n	n	2	1+4	13	13	y	y[2]	n	n	r	y	n	n		<10		n	n	n	c	32		n	n	n	n	n	sd	71	13	13	15
1	182	m	57	1	y	n	n	2	2	14	14	y	n	n	n	l	n	n	y		10=14		n	n	n	c	7		<10	<10	n	n	n	g	70	14	15	15	1	l basal ganglion	1*1*2	s	n	n	n	n	n
1	183	f	41	2	y	n	n	2	2	14	14	y	n	n	n	l	y	n	n		10=14	y	n	n	n	c	5		n	n	n	n	n	v	18	7	7	5	n	n	n	n	n	n	n	n	n
1	184	m	39	1	y	n	n	3	2+4	13	13	y	y	y	n		n	n	y		15=19	y	20	n	n	c	11		n	n	n	n	n	g	71	15	15	15	3
1	185	m	25	2	y	y	50	4	3	7	7	y	n	n	n	r	y	n	n		10=14	y	n	n	n	c	2		n	n	n	n	n	g	67	15	15	15	n	*	*	*	*	*	*	n	n
1	186	m	66	2	y	n	n	2	3	15	15	y	n	n	n	l	y	n	n		15=19	y	n	n	n	c	1		10	10=15	n	n	n	g		15			11	grossly ok
1	187	m	51	2	y	n	n	1	1	15	15	n	n	n	n	r	n	n	n	y	<10		2 ys	n	n	proximal occlusion	943		n	n	n	n	n	g	62	15	15	15	n
1	188	f	64	2	y	n	n	2	3	15	15	y	n	n	n	l	y	n	n		10=14		n	n	n	c	4		10=15	n	n	n	n	g	77	15	15	15	11	rt caudate	2	s	n	n	n	n	n
1	189	f	77	1	y	n	n	3	3+4	10	12	y	y[2]	n	hydrocephalus	r	y	n	n		<10	y	n	n	n	c	6		<10	n	n	n	n	v	72	11	11	11	6	R't MCA	large	c	left PO boderzone		s	n	n
1	190	f	59	2	y	y		4	3	15	13	y	n	n	n	r	y	n	n		<10		3	n	n	c	3		n	n	n	n	n	g	71	15	15		1	n	n	n	n	n	n	n	n
1	191	f	41	2	y	n	n	3	2	13	14	y	n	n	n	l	y	n	n		10=14	y	n	n	n	c	8		n	n	n	n	n	g	70	15	15	15	n	*	*	*	*	*	*	n	n
1	192	f	44	1	y	n	n	1	3	15	15	y	n	n	n	r	n	n	n	y	10=14		n	n	n	proximal occlusion	36		n	n	n	n	n	g	74	15	15	15	n	*	*	*	*	*	*	n	n
1	193	f	66	1	y	n	n	2	1+4	15	15	n	y	n	n	l	n	n	n	y	<10		8	n	n	c	35		<10	n	n	n	n	d-pons H.	2	3	3	3	y	n	n	n	n	n	n	d-pons H	n
1	194	f	73	1	y	n	n	3	3+4	8	8	y	y[2]	n	n		n	n	y		15=19		n	n	n	c	6		n	n	n	n	n	md	56	12	12	12	n	*	*	*	*	*	*	n	n
1	195	f	62	1	y	n	n	2	2	15	15	y	n	n	n	l	y	n	n		<10		n	n	n	c	7		n	n	n	n	n	g	68	15	15	15	n	*	*	*	*	*	*	n	n
1	196	m	58	1	y	n	n	3	2+4	6	11	y	y	n	n	r	n	n	y		15=19		n	n	n	c	5		<10	<10	n	n	n	g	69.8D	15	15	15	n	*	*	*	*	*	*	n	n
1	197	f	54	1	y	n	n	2	1	15	15	n	n	n	n	l	y	n	n		<10		n	n	n	c	6		n	n	n	n	n	g	68				1	*	*	*	*	*	*	n	n
1	198	f	40	1	y	n	n	1	2	15	15	y	n	n	n	l	n	n	y		10=14	y	n	n	n	c	3		<10	n	n	n	n	g	74	15	15	15	n	*	*	*	*	*	*	n	n
1	199	f	75	2	y	n	n	1	2	15	15	y	n	n	n	r	y	n	n		20=24	y	n	n	n	c	2		n	n	n	n	n	g	68	15	15	15	n	*	*	*	*	*	*	n	n
1	200	f	43	2	y	n	n	2	3	15	15	y	n	n	n	l	n	n	y		<10		n	n	n	c	7		<10	<10	<10	n	n	md	67	11	13aphasia	13aphasia	n	*	*	*	*	*	*	n	n
1	201	f	51	1	y	n	n	3	3	14	14	y	n	n	n	r	y	n	n		15=19	y	n	n	n	c	5		<10	n	n	n	n	md	72	14	14	15	n	*	*	*	*	*	*	n	n
1	202	f	85	2	y	n	n	3	3	11	11	y	n	n	n	r	y	n	n		<10	y	n	n	n	c	1		n	n	n	n	n	md	67	14	15	15	7	rt.caudate	1x1x1.5	s	n	n	n	n	n
1	203	m	38	2	y	n	n	2	3	12	12	y	n	n	n	l	n	y	n		<10		n	n	n	c	5		<10	n	n	y-r-d	t	sd	66	13	13	13	1	lt ACA-MCA	large	c	n	n	n	n	n
1	204	m	60	2	n	y	30	0	0	15	15	n	n	n	mass, lt basal cistern	l	y	n	n		20=24		n	n	n	c	30		n	n	n	n	n	g	66	15	15	15	n	*	*	*	*	*	*	*	n
1	205	m	35	2	y	n	n	4	3+4	9	7	y	y	n	hydrocephalus	l	n	n	y		<10	y	n	n	n	c	1		<10[6']	<10[6']	<10[5'], <10[6'], <10[6']	n	n	d	7d	3	3	3	2d	lt frontal	sizable	c	n	n	n	lt frontal retraction hematoma, brain swelling	n
1	206	m	67	1	y	n	n	4	3+4	6	7	y	y	n	n	r	y	n	n		>=30	y	n	n	n	c	3		n	n	n	n	n	d	2	4	3	3	n	*	*	*	*	*	*	*	n
1	207	f	53	1	y	n	n	2	2	15	15	y	n	n	n	r	y	n	n		10=14		n	n	n	c	8		n	n	n	n	n	g	71	14	15	15	n	*	*	*	*	*	*	*	n
1	208	m	42	2	y	n	n	1	3	15	15	y	n	n	n	r	n	n	y		10=14	y	n	n	n	c	24		n	n	n	n	n	g	64	15	15	15	n	*	*	*	*	*	*	*	n
1	209	m	36	2	y	n	n	1	1	15	15	y	n	n	n	l	n	n	y		10=14		n	n	n	c	4		n	n	n	n	n	g	74	15	15	15
1	210	f	31	1	y	n	n	1	2	15	15	y	n	n	n	r	n	n	y		<10		n	n	n	c	42		<10	n	n	n	n	g	71	15	15	15	n	*	*	*	*	*	*	*	n
1	211	f	56	2	y	n	n	1	2	15	15	y	n	n	n	l	y	n	n		<10		n	n	n	c	1		n	n	n	n	n	g	1	15	15	15	n	*	*	*	*	*	*	*	n
1	212	f	65	2	y	n	n	1	2+4	14	15	y	y	n	hydrocephalus	r	y	n	n		<10	y	n	n	n	c	60		<10[2'50'']	n	n	n	n	md	28m	15	15	15	5	rt basal ganglion	small	clinical[lt UL paralysis	n	n	n	n	n	SAH and IVH noted 2m before op and paralysis of lt UL was noted before op
2	212	f	66	2	*	*	*	*	*	15	15	*	*	*	*	l	n	y	n		<10		*	*	n	c	*		<10[7'55"]	<10[9'9"]	n	n	n	g	24m	15	15	15	1	n	n	n	n	n	n	n	n
1	213	f	44	2	y	n	n	2	2	15	15	y	n	n	n	l	n	n	y		<10		n	n	n	c	3		n	n	n	y-d	n	v	63	12	10		11	bil. Caudate nuc ; R't frontal ; L't parietal	moderate	c	n	n	n	n	n
2	213	f	44	2	*	*	*	*	*	15	15	*	*	*	*	r	y	n	n		<10		n	n	n	c	6		n	n	n	n	n	v	*	*	*	*	*	*	*	*	*	*	*	*	n
1	215	m	58	2	y	n	n	2	3+4	15	15	y	y[4]	n	n		n	n	n	y	<10	y	n	n	n	c	8		n	n	n	n	n	d	15d
1	216	m	39	2	n	y	13	0	0	15	15	n	n	n	n	r	y	n	n		10=14	y	n	n	n	c	13		n	n	n	n	n	g	70	15	15	15	n	*	*	*	*	*	*	*	n
2	216	m	39	2	*	*	*	*	*	15	15	*	*	*	*	r	n	n	y		<10		*	*	*	c	*		n	n	n	n	n	g	70	15	15	15	n	*	*	*	*	*	*	*	n
1	217	f	70	2	y	n	n	3	2	11	11	y	n	n	n		n	n	y		20=24	y	n	n	n	c	7		n	n	n	n	n	md	3	14	15	15	y	Rt ACA	large	c	n	n	n	n	n
1	218	f	23	1	y	n	n	2	2+4	15	15	y	n	y	n	l	n	n	y		10=14		n	n	n	c	2		n	n	n	n	n	g	113m	14	15	15	n	*	*	*	*	*	*	*	n
1	219	f	47	2	n	y	1	0	0	15	15	n	n	n	n	r	y	n	n		10=14		n	n	n	c	30		n	n	n	n	n	g	65	15	15	15	n	*	*	*	*	*	*	*	n
1	220	f	54	2	y	n	n	1	1+4	15	15	y	y	n	n	l	y	n	n		10=14	y	n	n	n	c	1		n	n	n	n	n	g	49	15	15	15	3	n	n	n	n	n	n	n	n
2	220	f	54	2	*	*	*	*	*	15	15	*	*	*	*	r	n	y	n		<10		*	*	*	c	43		n	n	n	n	n	g		15	15	15	2	n	n	n	n	n	n	n	n
1	221	f	38	1	y	n	n	3	3+4	14	14	y	n	y	n	l	n	n	n	y	10=14		n	n	n	c	3		n	n	n	n	n	g	67	15	15	15	n	*	*	*	*	*	*	*	n
1	222	f	54	2	y	n	n	3	3	13	13	y	n	n	n	r	n	y	n		<10		n	n	n	c	1		n	n	n	n	n	g	31	15	15	15	n	*	*	*	*	*	*	*	n
1	223	m	46	2	y	n	n	1	2	15	15	y	n	n	n	r	y	n	n		10=14	y	n	n	n	c	7		n	n	n	n	n	g	123	15	15	15	n	*	*	*	*	*	*	*	n
1	224	f	63	2	y	n	n	2	3	14	14	y	n	n	n	r	n	y	n		10=14		n	n	n	c	8		n	n	n	n	n	g		15	15	15	n	*	*	*	*	*	*	*	n
1	225	f	45	2	y	n	n	2	2	14	14	y	n	n	n	r	n	y	n		<10		n	n	n	c	4		n	n	n	n	n	md	31
1	226	f	84	1	y	y	5	3	3+4	8	8	y	y[2]	y	n	r	y	n	n		15=19	y	n	n	n	c	6		n	n	n	n	n	g	6.24	15	15	15	n	*	*	*	*	*	*	*	n
1	227	f	39	2	y	n	n	1	2	15	15	y	n	n	n	r	y	n	n		10=14		n	n	n	c	36		<10	n	n	n	n	g	55	14	15	15	n	*	*	*	*	*	*	*	n
1	228	f	76	1	y	y	3	4	2	9	9	y	n	n	n	l	y	n	n		15=19	y	n	n	n	c	60		n	n	n	n	n	d	1	3	3	3	n	*	*	*	*	*	*	*	n
1	229	m	34	2	y	n	n	3	2+4	14	14	y	y[2,3,a,4]	n	n	l	n	n	y		10=14		n	n	n	c	9		>20	n	n	y-d	c	g	65	15	15	15	n	*	*	*	*	*	*	*	n
1	230	f	57	1	y	n	n	2	1	15	15	y	n	n	n	r	y	n	n		<10	y	n	n	n	c	7		n	n	n	n	n	g	52	15	15	15	n	*	*	*	*	*	*	*	n
1	231	m	51	2	y	n	n	4	3+4	15	3	y	n	y	n	r	y	n	n		10=14	y	8	21	n	c	14		10	n	n	n	n	sd	7.25d	12	12	n	n	*	*	*	*	*	*	*	n
1	232	f	70	1	y	y	2	3	3+4	14	14	y	y[2]	n	n	r	y	n	n		10=14	y	n	n	n	c	2		n	n	n	n	n	g	66	15	15	15	n	*	*	*	*	*	*	*	n
1	233	f	61	2	y	n	n	3	2+4	12	13	y	y	n	n	l	y	n	n		10=14	y	n	n	n	c	3		n	n	n	n	n	g	51	15	15	15	n	*	*	*	*	*	*	*	n
1	234	f	44	2	y	y		1	3+4	15	15	y	n	y[rt temporal]	n	l	n	y	n		<10		n	n	n	c	10		n	n	n	n	n	g	1	15	15	15	n	*	*	*	*	*	*	*	n
1	235	f	61	1	y	n	n	4	3+4	7	8	y	y[2,3,a,4]	n	n	l	y	n	n		15=19	y	n	n	n	c	20		<10	n	n	n	n	v	64	10	10	10	1	left Frontal	c	n	n	n	n	n	n
1	236	f	45	2	y	n	n	2	2+4	15	15	y	n	y[rt temporal]	n	r	n	y	n		<10		n	n	n	c	8		n	n	n	n	n	md	1					R't MCA	moderate	s	n	n	n	n	n
1	237	f	62	2	y	n	n	3	3	10	7	y	n	n	n	l	n	n	n	y	10=14	y	n	n	n	c	9		n	n	n	n	n	g	63	13	13	15	n	*	*	*	*	*	*	*	n
1	238	f	59	2	y	n	n	2	2	15	15	y	n	n	n	l	n	y	n		10=14	y	n	n	n	c	34		<10	n	n	n	n	g	57	15	15	15	n	*	*	*	*	*	*	*	n
1	239	f	53	1	y	n	n	2	2	14	14	y	n	n	n	l	n	y	n		10=14		n	n	n	c	11		n	n	n	n	n	g	63	15	15	15	n	*	*	*	*	*	*	*	n
1	240	f	42	1	y	n	n	1	2	15	15	y	n	n	n	l	n	n	y		<10	y	n	n	n	c	9		<10	n	n	n	n	g	63	15	15	15	n	*	*	*	*	*	*	*	n
1	241	f	58	2	y	n	n	3	2	15	15	y	n	n	n	r	y	n	n		<10	y	n	n	n	c	2		n	n	n	n	n	g	70	15	15	15	n	*	*	*	*	*	*	*	n
1	242	f	52	2	y	n	n	1	4	15	15	n	n	y[not due to aneurysm]	n	l	y	n	n		<10		n	n	n	c	16		n	n	n	n	n	g	60	n	n	n	n	*	*	*	*	*	*	*	n
1	243	m	41	2	y	n	n	2	3	15	15	y	n	n	n	r	y	n	n		10=14	y	n	n	n	c	3		n	n	n	n	n	g	52	15	15	15	1	*	*	*	*	*	*	*	n
1	244	m	70	2	y	n	n	3	3+4	12	12	y	y[2,3]	n	n		n	n	y		<10		n	n	n	c	14		n	n	n	n	n	d-sepsis	9d
1	245	m	56	2	y	n	n	3	3+4	11	11	y	y[4]	n	n	r	n	n	n	y	10=14	y	n	n	n	c	23		n	n	n	n	n	g	55	15	15	15	1	rt. Cerebellum	2x1x2	s	n	n	n	n	n
1	246	f	36	1	y	n	1	1	3	15	15	y	n	n	n	l	y	n	n		<10		n	n	n	c	3		n	n	n	n	n	g	9	15	15		n	*	*	*	*	*	*	*	n
1	247	f	53	1	y	n	n	2	2	15	15	y	n	n	n	l	n	n	y		<10		n	n	n	c	6		<10	n	n	n	n	g	1	15	15	15
1	248	f	59	1	n	y	6	0	0	15	15	n	n	n	n	r	y	n	n		10=14	y	n	n	n	c	6		10	n	n	n	n	g	49	15	15	15
1	249	f	68	2	y	n	n	2	3+4	14	10	y	n	y[lt tempal]	n	l	n	y	n		25=29		n	n	n	c	2		n	n	n	y-d-n	trapping with ec-ic bypass	sd	54	10	10	10	n	*	*	*	*	*	*	*	n
1	250	f	59	1	n	n	n	0	0	15	15	n	n	n	mass, rt paraclinoid	r	y	n	n		>=30		n	n	s	c	59		15=20	n	n	y-d-d	c+t	md		11	12	15	5	rt mca	large	c	n	n	n	hydrocephalus	n
2	250	f	59	1	n	n	n	0	0	15	15	n	n	n	mass, rt paraclinoid	r	n	y	n		<10		*	*	*	c	*		n	n	n	n	n	md		*	*	*	n	*	*	*	*	*	*	*	n
3	250	f	59	1	n	n	n	0	0	15	15	n	n	n	mass, rt paraclinoid		n	n	n	y	*		*	*	*	wrapping	*		n	n	n	n	n	md		*	*	*	n	*	*	*	*	*	*	*	n
1	251	m	15	2	y	n	n	4	1+4	4	4	y	y[2,3,a,4]	n	n	l	y	n	n		>=30		n	n	n	c	1		n	n	n	n	n	d	5d				n	*	*	*	*	*	*	*	n
1	252	f	56	2	y	n	n	3	3	15	12	y	n	n	hydrocephalus	l	y	n	n		<10	y	1	n	n	c	2		n	n	n	n	n	g	27m	15	15	15	2m	n	n	n	n	n	n	n	n
1	253	f	83	2	y	n	n	2	3+4	15	7	y	y[2,3,a,4]	n	hydrocephalus	r	y	n	n		10=14	y	1	n	n	c	1		<10	n	y	n	n	v	64	4	4	n	n	*	*	*	*	*	*	*	n
1	254	f	56	2	y	n	n	3	2	12	12	y	n	n	n	r	y	n	n		<10		n	n	n	c	2		<10	n	n	y-r-d[retract arachnoid memb which adhered to aneurysm]	t	d	10d	3	3	3	5d	rt MCA	large	c	n	n	n	n	n
1	255	f	68	2	y	n	n	1	2	14	14	y	n	n	n	l	y	n	n		<10	y	n	n	n	c	1		n	n	n	n	n	g	54	15	15	15	n	*	*	*	*	*	*	*	n
1	256	m	80	1	y	n	n	4	3	7	7	y	n	n	n	r	y	n	n		10=14		n	n	n	c	6		10	n	n	n	n	d	17											Expired<1m
1	257	f	60	2	y	n	n	2	3	14	14	y	n	n	n	l	y	n	n		10=14		n	n	n	c	4		n	n	n	n	n	d-acute hydro	49d	14
1	258	m	52	1	y	n	n	2	3	15	15	y	n	n	n		n	n	n	y	15=19	y	n	n	n	c	19		n	n	n	n	n	md	53	10	12	15	n	*	*	*	*	*	*	*	n
1	259	m	64	1	n	y	23	0	0	15	15	n	n	n	n	r	y	n	n		<10		n	n	n	c	1		n	n	n	n	n	g	51	15	15	15	n	*	*	*	*	*	*	*	n
2	259	m	64	1	*	*	*	*	*	15	15	*	*	*	*	r	n	n	y		<10		n	n	n	c	1		n	n	n	n	n	g	51	15	15	15	n	*	*	*	*	*	*	*	n
1	260	f	70	1	y	n	n	1	1	15	15	y	n	n	n	r	y	n	n		10=14	y	n	n	n	c	1		n	n	n	n	n	g	30	15	15	15	n	*	*	*	*	*	*	*	n
1	261	m	66	1	y	n	n	2	2	15	15	y	n	n	n		n	n	y		<10		n	n	n	c	11		n	n	n	n	n	g	51	15	15	15	n	*	*	*	*	*	*	*	n
1	262	f	64	2	y	n	n	3	3	10	10	y	n	n	n	l	n	n	y		10=14	y	n	n	n	c	2		10	10=15	10=15	y-d-d	c,t	d	13day	3
1	263	f	56	1	y	n	n	1	3	15	15	y	n	n	n		n	n	y		<10	y	n	n	n	c	14		n	n	n	n	n	g	50	15	15	15	n	*	*	*	*	*	*	*	n
1	264	f	55	1	y	n	n	2	3+4	15	15	y	y[2]	n	n		n	n	y		10=14		n	n	n	c	14		n	n	n	n	n	md	50	15	15	15	n	*	*	*	*	*	*	*	n
1	265	m	27	2	y	n	n	1	2+4	15	15	y	y[2,3,a,4]	y	n	l	y	n	n		10=14	y	n	n	n	c	6		n	n	n	n	n	g	50	15	15	15	n	*	*	*	*	*	*	*	n
1	266	f	56	2	y	n	n	4	3+4	6	6	y	y[2,3]	n	n	l	y	n	n		<10	y	n	n	n	c	6		n	n	n	n	n	d	7	3
1	267	f	60	1	y	y	1	4	3	7	6	n	y[2,3,a,4]	y	n	l	y	n	n		20=24		n	n	n	c	2		<10	n	n	n	n	sd	21	11	11	12	6	lt. MCA	large	c	n	n	n	n	n
1	268	m	53	1	y	n	n	2	2+4	15	15	y	n	y,rt temporal	n	r	n	y	n		10=14		n	n	n	c	1		<10[3'48"]	n	n	n	n	g	23m	15	15	15	n	*	*	*	*	*	*	*	n
1	269	m	51	2	y	n	n	2	2+4	14	14	y	y[2]	n	n	l	y	n	n		10=14		n	n	n	wrapping	49		<10	n	n	n	n	g	25	15	15	15	n	*	*	*	*	*	*	*	n
1	270	m	39	1	y	n	n	4	3	7	7	y	n	n	n		n	n	y		<10	y	n	n	n	c	4		<10	n	n	n	n	md	16	12	12	15	6	rt.frontal	moderate	s	rt.pareital	moderate	s	rt.chronic SDH	n
1	271	m	71	1	y	n	n	2	3	13	13	y	n	n	n	l	n	n	y		10=14		n	n	ICH	c	4		<10	<10	n	n	n	v	85	8			1	rt. Frontal	4*3*4	c	n	n	n	n	n
1	272	f	49	2	y	n	n	4	3+4	9	9	y	y[2,3,a,4]	n	hydrocephalus		n	y	n		10=14		n	n	n	c	1		15=20	10=15	n	n	n	d	0.09	3			8d	l frontal ant.lat	80	c	l basal gal	28	c	n	n
1	273	f	53	2	y	n	n	3	2+4	10	10	y	y[2,4]	n	n	l	n	n	n	y	<10		n	n	n	wrapping	5		<10	<10	n	n	n	g	88	15	15	15	n	*	*	*	*	*	*	*	n
1	274	f	63	1	y	n	n	4	3	10	10	y[sah 5m ago	n	n	hydrocephalus	l	y	n	n		<10		n	n	s	c	150		n	n	n	y-d-d	clip	sd	5	10	12	15	1	n	n	n	n	n	n	n	n
1	275	f	56	2	y	n	n	2	3	15	15	y	n	n	n	l	y	n	n		<10		n	n	n	c	1		10=15	n	n	n	n	g		15	15	15	n	*	*	*	*	*	*	*	n
1	276	f	63	2	y	n	n	3	3+4	7	7	y	y	y	n	l	y	n	n		<10		n	n	lt mca infarction	c	3		n	n	n	n	n	d	13d	3	3	3	n	*	*	*	*	*	*	*	n
1	277	f	67	2	y	n	n	1	1	15	7	y	n	n	n	l	y	n	n		10=14		n	n	n	c	22		n	n	n	n	n	g	28	15	15	15	n	*	*	*	*	*	*	*	n
1	278	f	45	2	y	n	n	2	1	15	15	n[because done 15d later]	n	n	n	r	y	n	n		<10[baby aneurysm, 1.8mm]		n	n	n	c	15		n	n	n	n	n	g	3m	15	15	15	n	*	*	*	*	*	*	*	n
1	279	m	56	2	n	n	n	0	0	15	15	n	n	n	n	r	y	n	n		15=19	y	n	n	n	c	9		n	n	n	n	n	g	25	15	15	15	n	*	*	*	*	*	*	*	n
1	280	f	72	1	y	n	n	3	3+4	13	13	y	n	y	n	l	n	y	n		<10	y	n	n	n	c	1		n	n	n	n	n	d-apnea	16d
1	281	m	43	1	n	n	n	0	0	15	15	n	n	n	n		n	n	y		<10		n	n	n	wrapping	30		n	n	n	n	n	g	60	15	15	15	n	*	*	*	*	*	*	*	n
1	282	m	37	1	y	n	n	3	2+4	13	14	y	y[2,3,a,4]	y	n		n	n	y		<10	y	6	n	n	c	2		<10	<10	n	n	n	d	7d	3
1	283	f	35	2	y	n	n	3	3	10	10	y	n	n	hydrocephalus	r	y	n	n		<10	y	n	n	ventriculitis	c	2		10=15	n	n	y-d-d	t	sd	12	12	13	14	10d	rt mca large hemorrhagic infarct	large	c	n	n	n	n	n
1	284	m	38	2	y	n	n	2	2+4	14	14	y	y[3]	n	n		n	n	y		<10	y	n	n	n	c	7		n	n	n	n	n	g	38	15	15	15	n	*	*	*	*	*	*	*	n
1	285	m	36	2	y	n	n	3	3+4	11	11	y	y[2,3,a,4]	y	n	r	y	n	n		<10		10	21	n	c	2		n	n	n	n	n	md	30	9	11	12	1	rt. MCA	large	c	n	n	n	n	n
1	286	m	60	1	y	y	n	4	3+4	6	6	y	y	n	hydrocephalus	l	y	n	n		<10	y	n	n	lt hemiplegia	c	1		<10[25"]	n	n	n	n	md	17m	14	15	15	n	*	*	*	*	*	*	*	n
1	287	f	68	2	n	y	7	0	0	15	15	n	n	n	n	l	y	n	n		<10		n	n	lt mca and aca large infarct	c	7		10=15[15']	<10[5']	<10[5'], <10[5']	y-c-n	c+t, hypotension	d	2	4	3	3	3d	lt mca infarct	large	c	lt aca territory	large	c	n	n
1	288	m	70	2	y	n	n	3	3+4	12	12	y	y[2,3]	n	n		n	n	y		10=14	y	n	n	n	c	2		10=15	n	n	n	n	d	2		3	3
1	289	f	82	2	y	n	n	4	2+4	9	8	y	n	y	n	l	n	y	n		10=14		n	n	n	c	1		n	n	n	n	n	v	16	9	9	n	n	*	*	*	*	*	*	*	n
1	290	m	55	2	y	n	n	1	2	15	15	y	n	n	n	l	y	n	n		<10		n	n	n	c	3		n	n	n	n	n	g	27	15	15	15	n	*	*	*	*	*	*	*	n
1	291	m	56	2	y	n	n	1	1	15	15	n	n	n	mass, rt temporal	r	n	y	n		>=30	y	n	n	n	c	2		u	n	n	n	n	md		15	15	15	5d	rt MCA	large	c	n	n	n	n	n
1	292	m	70	1	y	n	n	2	3	15	15	y	n	n	n	r	n	n	n	y	10=14		n	n	n	c	2		n	n	n	n	n	g	26	15	15	15	n	*	*	*	*	*	*	*	n
2	292	m	70	2	*	*	*	*	*	15	15	*	*	*	*	r	y	n	n		<10		n	n	n	c	1		n	n	n	n	n	d	12d	3	3	3	n	*	*	*	*	*	*	*	n
3	292	m	70	2	*	*	*	*	*	15	15	*	*	*	*	r	n	y	n		<10		n	n	n	c	1		n	n	n	n	n	d	12d	3	3	3	n	*	*	*	*	*	*	*	n
1	294	m	65	2	y	n	n	3	3+4	9	9	y	y[2,3,a,4]	n	n	l	y	n	n		<10	y	n	n	n	c	1		n	n	n	n	n	g	25	15	15	15	n	*	*	*	*	*	*	*	n
1	295	f	69	2	y	n	n	3	2+4	15	12	y	y[4]	n	hydrocephalus	l	y	n	n		20=24	y	n	n	n	c+proximal ica ligation	5		n	n	n	y-d-n	carotid a. ligation	d	9d	3	3	3	n	*	*	*	*	*	*	*	n
1	296	m	51	2	y	n	n	4	3+4	6	5	y	y[2,3,a,4]	y	n	l	n	y	n		10=14	y	9	n	n	c	1		<10	n	n	n	n	v	5	9	9	9	1	L MCA+ACA+PCA and Right ACA infarct	large	c	n	n	n	n	n
1	297	f	39	2	y	n	n	2	2+4	13	15	y	y[2]	y	n		n	n	y		10=14	y	n	n	n	c	5		n	n	n	y-d-d	t	md	25	15	15	15	1	lt ACA inf	moderate	s	n	n	n	n	n
1	298	f	74	1	y	n	n	2	2+4	15	15	y	n	n	n	r	n	n	n	y	<10		n	n	n	c	10		<10	n	n	n	n	g	32	15	15	15	n	*	*	*	*	*	*	*	n
1	299	f	52	2	y	n	n	2	2	14	14	y	n	n	n	l	n	y	n		<10		n	n	n	c	1		n	n	n	n	n	g	24	15	15	15	n	*	*	*	*	*	*	*	n
1	300	m	54	2	y	n	n	1	3	15	15	y	n	n	n		n	n	y		<10		n	n	n	c	2		n	n	n	n	n	g	24	15	15	15	n	*	*	*	*	*	*	*	n
1	301	m	64	1	y	n	n	2	2	14	14	y	n	n	n		n	n	y		10=14	y	n	n	n	c	1		n	n	n	n	n	g	24	15	15	15	n	*	*	*	*	*	*	*	n
1	302	f	66	2	y	n	n	4	3	15	11	y	n	n	hydrocephalus	r	n	n	y		10=14		n	n	n	c	2		10	n	n	n	n	sd	19	11	11	11	18	l frontal	large	c	l frontal	small	s	n	n
1	303	f	82	1	n	y	5	0	0	15	15	n	n	n	n	l	y	n	n		<10		n	n	n	c	8		n	n	n	n	n	g	14	15	15	15	n	*	*	*	*	*	*	*	n
1	304	m	74	2	y	n	n	4	3+4	9	9	y	n	y[lt frontal; rt parietal]	n		n	n	y		10=14		n	n	n	c	23		<10	n	n	n	n	v					1	right MCA	large	c	n	n	n	n	n
1	305	m	35	2	y	n	n	2	3+4	15	15	y	n	y	n		n	n	y		10=14	y	n	n	n	c	2		10=15	n	n	y-d-d	t	md	20	15	15	15	7	lt ACA	small	s	n	n	n	n	n
1	306	f	55	1	y	n	n	1	1	15	15	y	n	n	n		n	n	y		<10		n	n	n	c	13		n	n	n	n	n	g	8	15	15		n	*	*	*	*	*	*	*	n
1	307	f	70	1	y	n	n	5	3+4	8	6	y	y[2,3,a,4]	n	n	l	n	n	y		10=14	y	n	n	n	c	1		n	n	n	n	n	v	4	6	6	9	1	rt frontal	2	s	n	n	n	n	n
1	308	f	60	2	y	n	n	4	2+4	7	7	y	n	y	n	r	n	y	n		<10	y	n	n	n	c	1		<10	n	n	y-d-d	t	md	20	11	15	15	12	rt MCA	large	c	n	n	n	hydrocephalus	n
1	309	m	38	2	y	n	n	2	2	15	15	y	n	n	n	r	n	y	n		<10		n	n	n	c	6		n	n	n	n	n	g	8	15	15		n	*	*	*	*	*	*	*	n
1	310	m	29	1	y	n	n	3	2+4	13	13	y	y[2,3,a,4]	n	n	l	n	n	n	y	10=14		n	n	n	c	9		n	n	n	n	n	g	20	15	15	15	n	*	*	*	*	*	*	*	n
1	311	m	65	1	y	n	n	2	2	15	15	y	n	n	n	l	y	n	n		10=14		n	n	n	c	5		n	n	n	n	n	g	20	15	15	15	n	*	*	*	*	*	*	*	n
1	312	f	56	2	y	n	n	2	2	15	15	y	n	n	n		n	n	y		<10		n	n	n	c	27		n	n	n	n	n	g	18	15	15	15	6	rt. caudate	1.2x1.2x2	s	n	n	n	n	n
1	313	f	75	2	y	n	n	3	2	11	11	y	n	n	hydrocephalus	l	y	n	n		10=14		n	n	n	c	8		n	n	n	n	n	md	19	14	14	15	n	*	*	*	*	*	*	*	n
1	314	f	59	2	y	n	n	3	3+4	11	11	y	y[2]	n	n	r	y	n	n		10=14	y	n	n	n	c	1		n	n	n	n	n	d	1	3
1	315	f	52	1	y	n	n	2	2	15	15	y	n	n	n	l	n	n	y		10=14	y	n	n	n	c	15		10	n	n	n	n	g	19	15	15	15
1	316	m	48	2	y	n	n	2	2	15	15	y	n	n	n	r	y	n	n		10=14	y	n	n	n	c	2		<10	n	n	n	n	g	17	15	15	15	n	*	*	*	*	*	*	*	n
1	317	m	52	1	y	n	n	1	2	15	15	y	n	n	n	r	n	n	y		10=14		n	n	n	c	4		10	n	n	n	n	g	17	15	15	15
1	318	m	48	2	y	n	n	4	2+4	6	7	y	y	n	n		n	n	y		<10		1	n	n	c	7		n	n	n	n	n	v	51	8	10	10	n	*	*	*	*	*	*	*	n
1	319	m	48	2	y	n	n	4	3+4	9	9	y	y[2,4]	y	hydrocephalus	l	n	n	y		10=14		1	n	n	c	7		n	n	n	n	n	sd	20	10	10	12
1	320	m	31	1	y	n	n	1	1	15	15	n	n	y[lt frontal]	AVM, lt frontal	l	y	n	n		10=14	y	n	n	n	c	*[post s/s 10-30d]		n	n	n	n	n	g	45	15	15	15	y	n	n	n	n	n	n	n	n	1.Associated with lt frontal pericallosal giant AVM
1	321	f	39	2	y	n	n	3	3	11	11	y	n	n	n	r	y	n	n		10=14	y	n	n	n	c	2		n	n	n	n	n	md	19	14	15	15	1//3	r mca	large	c	n	n	n	hydrocephalus	n
1	322	f	20	1	y	n	n	4	4	8	11	n	n	y[cerebellar]	n	r	n	n	n	y	<10		n	n	n	c	19		n	n	n	n	n	md	26	14	15	15	y	Cerebellar , large		c	n	n	n	n	n
1	323	f	69	1	y	n	n	2	2	15	15	y	n	n	n	l	n	n	y		<10	y	n	n	n	c	6		<10	<10	<10	n	n	md	17	15	15	15	n	*	*	*	*	*	*	*	n
2	323	f	69	1	*	*	*	*	*	15	15	*	*	*	*	l	y	n	n		<10		n	n	n	c	*		<10	<10	n	n	n	md	17	15	15	15	n	*	*	*	*	*	*	*	n
3	323	f	69	1	*	*	*	*	*	15	15	*	*	*	*	l	n	y	n		<10		n	n	n	c	*		<10	<10	<10	n	n	md	17	15	15	15	n	*	*	*	*	*	*	*	n
1	324	f	62	2	y	n	n	1	3+4	15	15	n	n	y[rt temporal]	n	r	n	y	n		10=14		n	n	n	c	6		n	n	n	n	n	g	35	13	15	15	2	rt temporal	moderate	s	n	n	n	n	n
1	325	f	49	1	y	y	1	2	2	15	15	y	n	n	n	r	y	n	n		10=14	y	n	n	n	wrapping	1		n	n	n	n	n	g	19	15	15	15
1	326	m	31	1	n	n	n	0	0	15	15	n	n	n	mass, rt temporal	r	n	y	n		>=30	y	n	n	n	c	10		<10	<10	n	n	n	g	18	15	15	15	n	*	*	*	*	*	*	*	n
1	327	m	44	2	y	n	n	3	2	7	7	y	n	n	n	r	n	y	n		20=24		n	n	n	c	1		n	n	n	n	n	md	18	15	15	15	1	r mca	large	c	n	n	n	n	n
1	329	f	42	1	y	n	n	1	2	15	15	y	n	n	n	r	y	n	n		<10		n	n	n	c	14		n	n	n	n	n	g	18	15	15	15	n	*	*	*	*	*	*	*	n
1	330	m	44	1	y	n	n	4	3+4	7	7	y	n	y[lt frontal]	n		n	n	y		15=19	y	n	n	n	c	2		10=15	n	n	y-d-d	t	md	16	15	15	15	n	*	*	*	*	*	*	*	n
1	331	f	56	1	n	n	n	0	0	15	15	n	n	n	n	l	y	n	n		10=14	y	n	n	n	c	*		n	n	n	n	n	g	18	15	15
1	332	m	72	2	y	n	n	2	2	15	15	y	n	n	n	r	n	n	n	y	10=14	y	n	n	n	c	5		n	n	n	n	n	g	17	15	15	15	n	*	*	*	*	*	*	*	n
1	333	m	42	2	y	n	n	2	2	15	15	y	n	n	n		n	n	y		20=24	y	n	n	n	c	1		10=15	10=15	10=15	n	n	g	16	15	15	15	1	n	n	n	n	n	n	n	n
1	334	m	22	2	y	n	n	2	2	15	15	y	n	n	n	r	y	n	n		<10	y	n	n	n	c	*		n	n	n	n	n	g	16	15	15
1	335	f	46	2	y	n	n	1	2	14	14	y	n	n	n		n	y	n		10=14	y	n	n	n	c	10		n	n	n	n	n	g	16	15	15	15	n	*	*	*	*	*	*	*	n
1	336	f	79	1	y	n	n	3	2	15	15	y	n	n	n		n	n	y		10=14		n	n	n	c	8		n	n	n	n	n	sd	15	11	11	13	y	medial frontal small size	small	s	n	n	n	n	n
1	338	m	25	2	y	n	n	2	2	15	15	y	n	n	n	l	n	n	y		<10		n	n	n	c	2		<10	n	n	n	n	g	4	15	15	n	n	*	*	*	*	*	*	*	n
1	339	f	50	2	y	n	n	3	2+4	14	14	y	n	y[rt temporal]	n	r	y	n	n		10=14	y	n	n	n	c	1		n	n	n	n	n	md	15	15	15	15		R't MCA	moderate	s	n	n	n	n	n
1	340	f	44	2	y[2yrs ago]	n	n	1	1	15	15	n	n	n	n	r	y	n	n		<10		n	n	n	c	730		n	n	n	n	n	g	1	15	15	15	n	*	*	*	*	*	*	*	n
2	340	f	44	2	n	n	n	0	0	15	15	n	n	n	n	l	n	n	n	y	<10		n	n	n	wrapping	*		n	n	n	n	n	g	1	15	15	15	n	*	*	*	*	*	*	*	n
1	341	m	40	2	y	n	n	4	3+4	6	4	y	n	y	n		n	n	y		10=14		2	n	n	c	9		n	n	n	n	n	sd	13	8	11	11	1	n	n	n	n	n	n	n	n
1	342	f	64	2	y	n	n	4	2+4	7	7	y	y[2]	y	n	r	n	n	y		10=14		n	n	n	c	1		n	n	n	n	n	md	12	15	15	n	n	*	*	*	*	*	*	*	n
1	343	m	35	1	y	n	n	2	2+4	15	15	y	n	y[rt frontal]	n		n	n	y		<10		n	n	n	c	3		n	n	n	n	n	md	12	14	15
1	344	f	47	2	y	y		2	1	15	15	y[ct performed 24d later]	n	n	hydrocephalus	l	y	n	n		15=19	y	n	n	n	c	24		n	n	n	y-d-d	t	g	10	15	15	15	n	*	*	*	*	*	*	*	n
1	345	m	56	1	y	y	3	3	3	13	15	y	n	n	n	l	y	n	n		<10	y	n	n	n	c	3		n	n	n	y-d-n	c	md	9	11	15	15	3	lt ICA	large	c	n	n	n	n	n
1	346	f	57	1	y	n	n	2	2	15	15	y	n	n	n	r	y	n	n		<10		n	n	n	c	5		n	n	n	n	n	g	26	15	15	15	n	*	*	*	*	*	*	*	n
2	346	f	57	1	*	*	*	*	*	15	15	*	*	*	*	r	y	n	n		*[fusiform]		*	*	*	wrapping	*		n	n	n	n	n	g	*	*	*	*	*	*	*	*	*	*	*	*	n
3	346	f	57	1	*	*	*	*	*	15	15	*	*	*	*	r	n	n	y		<10		*	*	*	c	*		n	n	n	n	n	g	*	*	*	*	*	*	*	*	*	*	*	*	n
4	346	f	57	1	n	n	n	0	0	15	15	n	n	n	n	l	n	y	n		<10		*	*	n	c	*		<10[1'55"]	<10[5'10"]	<10[49"],<10[43"]	n	n	g	24	15	15	15	n	*	*	*	*	*	*	*	n
1	347	m	25	2	y	n	n	2	3+4	14	14	y	y[2,3,a,4]	n	n		n	n	y		<10		n	n	n	c	4		n	n	n	n	n	g	50	15	15	15	n	*	*	*	*	*	*	*	n
1	348	f	83	1	y	n	n	2	2+4	14	14	y	n	y	n		n	n	y		10=14	y	n	n	n	c	3		<10	<10	<10	n	n	md	49	11	14	14	n	*	*	*	*	*	*	*	n
1	349	m	33	2	y	n	n	1	4	14	14	n	n	y	n	l	n	y	n		<10		n	n	n	c	2		n	n	n	n	n	sd	50	11	11	11	n	*	*	*	*	*	*	*	n
1	350	f	47	1	y	y	1	3	2+4	13	7	y	y[4]	y	n	l	y	n	n		<10		1	n	n	c	1		n	n	n	n	n	d	16d	7	12	3	y	n	n	n	n	n	n	brain abscess	n
1	351	f	79	2	y	n	n	3	3	11	11	y	n	n	n	r	n	n	y		10=14	y	n	n	n	c	7		10	n	n	n	n	g	19	15	15	15	4	frontal	small	s	n	n	n	n	n
1	352	f	60	2	y	n	n	3	3+4	12	12	y	n	y	n	l	y	n	n		25=29	y	n	n	n	c	2		10=15	n	n	n	n	md	9.09	11	15	15	1	lt. basal gangl	big	c	lt. PCA	big	c	n	n
1	353	f	59	1	y	n	n	4	3+4	6	6	y	y	n	hydrocephalus	l	y	n	n		10=14	y	n	n	n	wrapping+silver stone+ postop embolization	2				n	n	n	d	2m	4	3	3	2	lt mca infarct	large	c	rt ica, cerebellar	large	c	herniation was noted	n
1	354	m	50	2	y	n	n	3	2	12	12	y	n	n	n		n	n	y		10=14		n	n	n	c	2		10=15	n	n	n	n	g	18.19	15	15	15	1/3.	l exteral capsule	0.5	s	n	n	n	n	n
1	355	m	21	1	y	n	n	2	3	15	15	y	n	n	n	l	y	n	n		10=14	y	1	n	n	c	4		10	n	n	n	n	g	3.21	15	15	15
2	355	m	21	1	*	*	*	*	*	15	15	*	*	*	*	l	n	y	n		20=24	y	n	n	n	c	4		10	n	n	n	n	g	*	*	*	*	*	*	*	*	*	*	*	*	n
1	356	m	45	2	y	n	n	4	3+4	15	6	y	y	y[rt temporal]	hydrocephalus	r	n	y	n		25=29	y	?	n	rt hemispheric large infarct immediately after op	c	1		10	10	10	y	temporalclip	v	5	6	9	9	4	rt frontoparietal	large	clinical[lt hemiplegia	n	n	n	n	n	Did CTA but not angio
1	357	m	37	1	y	y[multiple cranial nerve palsy]	15	1	1	15	15	n	n	n	n	l	y	n	n		20=24		n	n	n	trapping	>14		n	n	n	n	n	g	19m	15	15	15	n	*	*	*	*	*	*	n	n	abducens palsy and oph op done on 930311 and 930708
1	358	f	66	2	y	y	2	2	2	14	1	y	n	n	n	l	y	n	n		10=14	y	n	n	n	c	2		n	n	n	n	n	g	4	14	14	n	n	*	*	*	*	*	*	*	n
1	359	f	62	1	y	n	n	2	3	15	15	y	n	n	n		n	n	y		<10	y	n	n	seizure, ICH[left cerebellar]	c	2		n	n	n	n	n	md	10	11			1	L't fronta	moderate	s	n	n	n	n	n
1	360	f	63	1	y	n	n	4	2	9	9	y	n	n	n		n	n	y		<10		n	n	n	c	19		n	n	n	n	n	v	32	9	10	12	1	left MCA	large	c	lt. PCA	large	c	n	n
1	361	f	55	2	y	n	n	3	3	9	9	y	n	n	n	r	n	y	n		25=29		n	n	n	c	1		n	n	n	n	n	sd	32	9	15	15	1	rt.MCA	large	c	n	n	n	n	n
1	362	f	34	2	y	n	n	1	1	15	15	n	n	n	n	l	n	n	y		<10		n	n	n	c	33		n	n	n	n	n	g	3	15	15		n	*	*	*	*	*	*	*	n
1	363	m	71	1	y	n	n	4	3+4	6	9	y	y	n	hydrocephalus	l	n	n	n	y	15=19	y	n	n	n	c	98		<10	n	n	n	n	sd	62	11	11	12	n	*	*	*	*	*	*	*	n
1	364	m	53	1	y	n	n	1	2	15	15	y	n	n	n	r	y	n	n		<10		n	n	n	trapping	10		n	n	n	n	n	g	24	15	15	15	n	*	*	*	*	*	*	*	n
1	365	f	63	2	y	n	n	3	2	13	15	y	n	n	n	r	n	y	n		<10		n	n	n	wrapping	7		n	n	n	y-d-n	c	g	28	15	15	15	n	*	*	*	*	*	*	*	n
1	366	f	66	2	y	n	n	2	3	14	14	y	n	n	n	l	y	n	n		<10		n	n	n	c	1		n	n	n	n	n	d	16d
1	367	f	50	2	y	n	n	1	1	15	15	y	n	n	n	r	y	n	n		<10		n	n	n	c	3		n	n	n	n	n	g	12	15	15	15
1	368	f	44	1	y	n	n	2	2	15	15	y	n	n	hydrocephalus	l	n	n	y		<10		n	n	n	c	3		<10[11"]	<10[1'11"]	n	n	n	g	23	14	15	15	n	*	*	*	*	*	*	*	n
1	369	f	67	2	y	n	n	3	1	13	13	y	n	n	n		n	n	y		<10		n	n	n	c	1		10=15	10=15	10=15	n	n	md	21	9	14	15	n	*	*	*	*	*	*	*	n
1	370	f	48	2	y	n	n	2	2	14	14	y	n	n	n	r	n	y	n		<10	y	n	n	n	c	1		n	n	n	n	n	g	31	15	15	15	n	*	*	*	*	*	*	*	n
1	371	m	40	2	y	n	n	3	3	7	7	y	n	n	n		n	n	y		<10		n	n	n	wrapping	1		n	n	n	n	n	g	29	15	15	15	n	*	*	*	*	*	*	*	n
1	372	f	49	2	y	n	n	2	2	15	15	y	n	n	n	l	y	n	n		<10	y	n	n	n	c	8		n	n	n	n	n	g	26m	15	15	15	n								n
1	373	f	49	2	y	n	n	4	3+4	8	8	y	y[2]	n	hydrocephalus	l	y	n	n		>=30	y	n	n	n	c	1		n	n	n	n	n	d	24d	3
1	374	f	34	1	y	n	n	4	3+4	6	6	y	y[2,3,a,4]	n	n	r	n	n	y		10=14	y	n	n	n	c	14		n	n	n	n	n	sd	15.11	12	15	15	n	*	*	*	*	*	*	*	n
1	375	f	56	1	n	y	29	0	0	15	15	n	n	n	n	r	y	n	n		10=14	y	n	n	n	c	19		n	n	n	n	n	g	14	15	15	15	n	*	*	*	*	*	*	*	n
1	376	f	24	2	y	n	n	3	3	8	12	y	n	n	n	l	n	n	y		<10	y	n	n	n	c	2		n	n	n	n	n	g	8	15	15		n	*	*	*	*	*	*	*	n
1	377	f	53	1	y	n	n	2	2	15	15	y	n	n	n	l	y	n	n		<10	y	n	n	n	c	1		<10[2']	<10[4']	n	n	n	g	24	15	15	15	n	*	*	*	*	*	*	*	n
1	378	f	45	2	y	n	n	2	2	15	15	y	n	n	n	n	n	y	n		<10	y	n	n	n	c	27		n	n	n	n	n	g	7	15	15		n	*	*	*	*	*	*	*	n
1	379	f	45	2	y	n	n	2	2	15	15	y	n	n	n	r	y	n	n		<10		n	n	n	c	3		n	n	n	n	n	g	4	15	15		n	*	*	*	*	*	*	*	n
1	380	m	48	2	y	n	n	4	2+4	6	6	y	y	n	n	r	n	n	y		<10		n	n	n	c	16		n	n	n	n	n	v	6.23	6	6	6
1	381	m	51	2	y	n	n	2	1+4	14	14	n	y[2]	y[due to hi]	n	r	y	n	n		<10	y	n	n	n	c	9		<10	n	n	n	n	g	6	15	15	15	1	n	n	n	n	n	n	n	n
1	382	f	55	2	y	n	n	1	2+4	15	15	y	n	y	n	r	y	n	n		10=14		n	n	n	c	1		n	n	n	n	n	g	5	15	15	15	n	*	*	*	*	*	*	*	n
1	383	f	47	1	y	n	n	1	3	15	15	y	n	n	n	r	y	n	n		<10		n	n	n	c	6		n	n	n	y-d-d	n	md	6	14	15	15	1	R't frontal , periventicular ICH	sizable	c	n	n	n	n	n
1	384	f	42	2	y	n	n	1	2	15	15	y	n	n	n	l	n	y	n		<10		n	n	n	c	3		n	n	n	y-d-d	t	g		15	15	15	n	*	*	*	*	*	*	*	n
1	385	f	41	1	y	n	n	2	2	15	15	y	n	n	n	l	n	y	n		<10	y	n	n	n	c	11		<10	n	n	n	n	g	8	15	15		n	*	*	*	*	*	*	*	n
1	386	f	83	2	y	n	n	1	1	14	15	y	n	n	n		n	n	y		<10		n	n	n	wrapping	3		n	n	n	n	n	g	5	14	14	n	n	*	*	*	*	*	*	*	n
1	387	m	36	2	y	n	n	3	2+4	13	13	y	n	y[corpus callosum]	n	r	n	n	y		<10		8	n	n	trapping	7		15=20	n	n	y-r-d	trapping	g	5	15	15	15	1	n	n	n	n	n	n	n	n
1	388	m	41	1	y	n	n	2	2	15	15	y	n	n	n	r	y	n	n		<10		n	n	n	c	2		<10	n	n	n	n	g	4	15	15	15	1	n	n	n	n	n	n	n	n
1	389	m	64	1	y	n	n	2	2	14	14	y	n	n	n	r	y	n	n		10=14		n	n	n	c	7		n	n	n	n	n	g	5	15	15
1	390	f	86	1	y	n	n	2	2	14	14	y	n	n	n	r	n	y	n		10=14		n	n	n	c	7		n	n	n	n	n	g	4.19	15	15
1	391	f	68	2	y	n	n	2	2	14	14	y	n	n	n	l	n	n	y		10=14		n	n	n	c	10		n	n	n	n	n	md	4	14	14		1	l basal frontal	large	c	n	n	n	n	n
1	392	f	52	1	y	n	n	2	2	15	15	y	n	n	n	r	y	n	n		<10	y	n	n	n	c	7		n	n	n	n	n	g	5	15	15	15	n	*	*	*	*	*	*	*	n
2	392	f	52	1	*	*	*	*	*	15	15	*	*	*	*	l	y	n	n		<10		*	*	*	wrapping	*		n	n	n	n	n	g		15	15	15	n	*	*	*	*	*	*	*	n
3	392	f	52	1	*	*	*	*	*	15	15	*	*	*	*	l	y	n	n		<10		*	*	*	c	*		n	n	n	n	n	g		15	15	15	n	*	*	*	*	*	*	*	n
1	393	f	51	1	y	n	n	2	2	15	15	y	n	n	n	l	y	n	n		<10		n	n	n	c	2		n	n	n	n	n	d-PPU	15d	3	3	3	1	bilat., multiple	large	c	n	n	n	n	n	1.ESRD with hemodyalysis
2	393	f	51	1	*	*	*	*	*	15	15	*	*	*	*	l	y	n	n		<10		n	n	n	w+coagulation	*		n	n	n	n	n	d-PPU	*	*	*	*	*	*	*	*	*	*	*	*	n
1	394	f	61	2	y	n	n	4	3+4	7	7	y	n	n	n	l	n	y	n		10=14		n	n	n	c	1		n	n	n	n	n	d	4day	3
1	395	f	47	1	y	n	n	5	3	6	6	y	n	n	n	r	n	n	n	y	10=14	y	n	n	n	c	25		n	n	n	n	n	v	3	9	9		2	lt. MCA	large	c	post. fossa	large	c	n	n
1	396	f	49	1	y	n	n	2	2	15	14	y	n	n	hydrocephalus	l	y	n	n		10=14		n	n	n	wrapping	8		n	n	n	n	n	g	4	15	15
1	397	m	58	2	y	n	n	2	3	15	15	y	n	n	n		n	n	y		10=14		n	n	n	c	4		n	n	n	n	n	g	2	15
1	398	m	32	1	y	n	n	3	2	13	13	y	n	n	n		n	n	y		<10		n	n	n	c	3		n	n	n	n	n	g	2	15
1	399	m	48	1	y	n	n	2	2	15	15	y	n	n	n	l	n	n	y		10=14		n	n	n	c	2		10=15	10=15	20	n	n	d	0.18	3
1	400	m	37	1	y	n	n	2	2	15	15	y	n	n	n		n	n	y		10=14		n	n	n	c	1		n	n	n	n	n	g	2.07	15			5 day	l caudate	s	s	n	n	n	n	n
1	401	f	66	2	y	n	n	2	2	14	14	y	n	n	n	r	y	n	n		10=14	y	n	n	n	c	6		n	n	n	n	n	md	3	15	15
1	402	m	60	2	y	y	5	1	2	15	15	y	n	n	n	l	y	n	n		10=14	y	n	n	n	c	5		n	n	n	y-r-d	c+t	g	10	15	15	15	n	*	*	*	*	*	*	*	n
1	403	f	43	1	n	y	6	0	0	15	15	n	n	n	n	r	y	n	n		10=14		n	n	n	c	10		n	n	n	n	n	g	2.08	15
1	404	f	83	1	y	n	n	4	3	7	7	y	n	n	n	l	n	n	y		10=14	y	n	n	n	c	1		n	n	n	n	n	md	2	13
1	405	f	47	2	y	n	n	3	2+4	15	11	y	n	y[lt basal ggl	n	l	y	n	n		<10		1	6	n	c	2		n	n	n	n	n	md	1	13	15	15	3	lt basal ggl	large	c	n	n	n	hydrocephalus	n	1.Lt basal ggl hematoma caused by rebleeding.
1	406	f	64	2	y	n	n	4	3+4	7	7	y	n	y	n	r	n	y	n		10=14	y	n	n	n	c	1		10=15	n	n	y-d-n	clip	sd	1	14			1	rt MCA[basal ggl]	moderate[3*3*2]	c	n	n	n	n	n
1	407	m	69	2	y	n	n	2	1	15	15	y	n	n	n	r	y	n	n		10=14	y	n	n	n	c	13		10	10=15	n	n	n	g	33	15	15	15	1	n	n	n	n	n	n	small lt ant frontal meningioma	n	small lt ant frontal meningioma
1	408	m	61	1	y	n	n	4	3+4	9	9	y	y		hydrocephalus	r	n	n	n	y	<10		n	n	n	c	15		n	n	n	n	n	md		13	14	15	y	n	n	n	n	n	n	n	n
1	409	m	61	2	y	n	n	3	3+4	14	13	y	y	y[after rebleeding]	hydrocephalus	r	y	n	n		<10		5[presenting with lt hemiplegia]	n	rt hemispheric large infarct immediately after op	c	1		5	5	5	y-d-n	c+t	v	8	7	8	9	2	rt frototemporoparietal	large	c	n	n	n	n	n
1	410	m	24	2	y	n	n	2	3	14	14	y	n	n	hydrocephalus	r	y	n	n		10=14	y	n	n	n	c	1		<10[7']	n	n	y-d-d	c+t	g	8	15	15		1	n	n	n	n	n	n	SDH	n
1	412	f	45	1	y	n	n	2	2	14	14	y	n	n	n	r	n	y	n		10=14		n	n	n	c	2		<10	n	n	n	n	g		15	15	15	1	rt basal ggl	small	s	n	n	n	n	n
1	413	f	81	2	y	n	n	3	3+4	12	12	y	y[2]	n	hydrocephalus	r	y	n	n		<10		n	n	n	c	13		n	n	n	n	n	v	12	7	10	10	y[0.5, 1]	n	n	n	n	n	n	EDH,SDH,Brain swelling	n
1	414	f	49	1	y	n	n	2	3	15	15	y	n	n	n	r	n	y	n		<10		n	n	n	c	6		n	n	n	n	n	d	2	4	3		n	*	*	*	*	*	*	*	n
2	414	f	49	1	*	*	*	*	*	15	15	*	*	*	*	r	y	n	n		<10		*	*	*	c	*		n	n	n	n	n	d	*	*	*	*	n	*	*	*	*	*	*	*	n
1	415	f	42	2	y	n	n	3	3+4	13	13	y	y	n	hydrocephalus	r	y	n	n		<10	y	n	n	multiple infarct	c	3		n	n	n	n	n	d	3	12	3	3	0.3	rt basal ggl and caudate nuclei	sizable	c	rt parietotemporal	sizable	c	*	n
1	416	m	46	2	y	n	n	2	3+4	15	15	y	n	y[lt frontal]	hydrocephalus	l	n	n	y		<10		n	n	n	c	11		<10	<10[5']	n	n	n	g	1	15	15		n	*	*	*	*	*	*	*	n
1	417	m	61	2	y	n	n	2	3	15	15	y	n	n	hydrocephalus	l	n	n	y		<10	y	n	n	cns infection	c	6		<10[8']	n	n	n	n	md	8	14	14		n	*	*	*	*	*	*	*	n
1	418	m	47	2	y	n	n	4	2+4	7	7	y	n	y[rt putaminal]	n	r	y	n	n		<10		n	n	n	c	1		n	n	n	n	n	md		15	15	15	n	*	*	*	*	*	*	*	n
1	419	f	48	1	y	n	n	1	2	15	15	y	n	n	n	l	n	n	y		<10		n	n	n	c	10		n	n	n	n	n	g	10	15	15	15	n	*	*	*	*	*	*	*	n
1	420	m	43	1	n	n	n	0	0	15	15	*	*	*	*	r	n	y	n		15=19	y	*	*	*	c	*		n	n	n	n	n	g	*	*	*	*	*	*	*	*	*	*	*	*	n
2	420	m	43	1	n	n	n	0	0	15	15	*	*	*	*	r	y	n	n		<10		*	*	*	c	*		n	n	n	n	n	g	*	*	*	*	*	*	*	*	*	*	*	*	n
1	421	f	44	2	y	n	n	3	2	11	11	y	n	n	n	l	n	y	n		<10		n	n	n	c	4		<10	n	n	n	n	g	10	14	15	15	n	*	*	*	*	*	*	*	n
1	422	m	48	2	y	n	n	2	2	15	15	y	n	n	hydrocephalus	r	n	n	y		<10		n	n	n	c	1		<10[4']	n	n	n	n	g	9	15	15	15	1m	rt deep frontal	small	s	n	n	n	small SDH	n
1	423	f	39	2	y	n	n	3	3+4	6	12	y	y	n	hydrocephalus	l	n	n	y		<10		n	n	n	c	3		<10[2']	n	n	n	n	g	10	14	15	15	8m	rt aca territory infarct	large	s	n	n	n	hydrocephalus	n
1	424	f	44	1	y	n	n	4	3+4	6	8	y	y[2,3,a,4]	n	n	r	n	n	n	y	20=24	y	n	n	n	trapping	5		<10	n	n	n	n	g		15	15	15	n	*	*	*	*	*	*	*	n
1	425	f	74	2	y	n	n	2	3+4	13	13	y	y[2]	y[bifrontal, more on left]	n	l	n	n	y		<10	y	n	n	n	c	2		15=20	n	n	y-d-d	t	g
1	428	m	66	1	y	n	n	2	3+4	15	15	y	y	n	hydrocephalus	l	n	n	y		10=14	y	n	n	n	c	2		<10[8']	<10[2']	<10[1'30'']	n	n	g	10	15	15	15	y[6d]	n	n	n	n	n	n	hydrocephalus	n
1	429	f	52	2	y	n	n	2	2	15	15	y	n	n	n	r	n	n	y		<10		n	n	n	c	2		<10	n	n	n	n	g		15	15	15	n	*	*	*	*	*	*	*	n
1	430	f	76	2	y	n	n	2	2	14	15	y	n	n	n	l	y	n	n		10=14	y	n	n	n	c	3		<10	n	n	n	n	md	8	14	15		5m	lt and rt basal ggl	moderate	s	n	n	n	n	n
1	431	f	69	2	y	n	n	2	1	15	15	n	n	n	n	r	y	n	n		<10	y	n	n	n	c	3		n	n	n	n	n	g	8	15	15		n	*	*	*	*	*	*	*	n
1	432	m	41	2	y	n	n	2	3	15	15	y	n	n	hydrocephalus	r	n	n	y		<10	y	n	n	n	c	1		<10	n	n	n	n	g	8	15	15		n	*	*	*	*	*	*	*	n
1	433	f	42	1	y	n	n	3	3	12	12	y	n	n	hydrocephalus	l	y	n	n		<10	y	n	n	n	c	3		<10	n	n	n	n	g	6	15	15		n	*	*	*	*	*	*	*	n
1	434	f	72	2	y	n	n	4	3+4	9	9	Y	Y	N	hydrocephalus	l	n	n	y		<10	y	n	n	n	c	3		15=20[17' at lt A1]	n	n	n	n	v	7	8	9		y{1m]	lt aca territory	sizable	c	n	n	n	brain swelling	n	suprasellar small meningioma in front of optic chiasma
1	435	f	67	1	y	n	n	3	3+4	11	11	y	y	y	hydrocephalus	l	n	y	n		10=14	y	n	n	n	c	2		10=15	n	n	y-r-d	t	md	4	12	15		1	lt basal ggl	s	s	n	n	n	n	n
1	436	f	50	2	y	n	n	3	3	14	14	y	n	n	hydrocephalus	l	n	n	y		<10		n	n	n	c	1		n	n	n	y-r-d	t+suction	d	7d	3	3	3	5d	lt frontal	sizable	c	rt frontal	sizable	c	n	n
1	437	f	52	1	y	n	n	2	2	15	15	y	n	n	n	l	y	n	n		<10		n	n	n	c	2		<10[1']	n	n	n	n	g	29m	15	15	15	n	*	*	*	*	*	*	*	n
1	438	f	72	2	y	n	n	2	3+4	15	15	y	y	n	hydrocephalus	l	n	n	y		<10		n	n	n	c	2		<10	<10	n	n	n	md	4	15	15		y[0.3,1]	n	n	n	n	n	n	brain swelling	n
1	439	f	66	2	y	n	n	2	2	15	15	y	n	n	hydrocephalus	l	y	n	n		<10		n	n	n	c	2		<10	n	n	n	n	g	6	14	15		y[0.3]	n	n	n	n	n	n	brain swelling, hydro, SDH	n
1	440	f	46	1	y	n	n	3	3	12	12	y	y[3,4]	n	hydrocephalus	l	n	n	y		<10	y	n	n	n	c	22		<10	n	n	n	n	g	4	15	15	15	n	*	*	*	*	*	*	*	n
1	441	m	55	2	y	n	n	3	2+4	12	12	y	y	y	hydrocephalus	l	n	n	y		<10		n	n	n	c	19		<10	n	n	n	n	md	4	13	15		y[2wks]	lt aca territory	sizable	c	n	n	n	n	n
1	442	f	65	2	n	y	10	0	0	15	15	n	n	n	n	l	y	n	n		15=19	y	n	n	n	c	10		<10[1']	n	n	n	n	g	2	15	15		9d	n	n	n	n	n	n	n	n
1	443	f	20	1	y	n	n	3	2+4	10	10	y	n	y	multiple skull fx including frontal base	l	n	n	y		<10	y	n	n	n	c+proximal clip of lt a2	6		n	n	n	n	n	g	1	14	15		n	*	*	*	*	*	*	*	n
1	444	f	57	2	y	n	n	2	2	14	14	y	n	n	hydrocephalus	r	n	n	y		<10		n	n	n	c	2		<10[3]	n	n	n	n	g	2	15	15		7d	rt frontal	morderate	s	lt frontal	morderate	s	bifrontal small hematoma	n
1	445	m	47	2	y	n	n	4	3+4	6	9	y	y	n	hydrocephalus	l	n	n	y		<10		n	n	n	c	8		n	n	n	n	n	md	2	14	15		10d	n	n	n	n	n	n	small SDH	n	lung CA found one yr later
1	446	f	48	1	y	n	n	2	2	15	15	y	n	n	n	r	n	y	n		10=14	y	n	n	n	c	2		n	n	n	n	n	md	2	14	15		4d	n	n	n	n	n	n	rt f-t retraction hematoma and rt hemispheric swelling	n
1	447	m	36	2	y	n	n	2	2	15	15	y	n	n	hydrocephalus	l	n	n	y		<10		n	n	n	c	4		<10[7]	n	n	y-d-d	clip	g	2	15	15		21d	n	n	n	n	n	n	n	n
1	448	f	79	2	y	n	n	3	3+4	11	11	y	y[3,4]	n	hydrocephalus	l	y	n	n		<10	y	n	n	multiple infarct	c	2		n	n	n	n	n	v		6
1	449	f	51	2	y	n	n	2	2	15	15	y	n	n	hydrocephalus	l	n	n	y		<10		n	n	n	c	5		n	n	n	n	n	md	1	14	15		1	n	n	n	n	n	n	n	n
2	449	f	51	2	*	*	*	*	*	15	15	*	*	*	*	l	n	n	y		<10		*	*	*	c	*		n	n	n	n	n	md	*	*	*	*	*	n	n	n	n	n	n	n	n
1	451	f	65	1	y	n	n	2	3	15	15	y	n	n	hydrocephalus	r	n	y	n		<10[broad neck]	y	n	n	n	c	18		<10[<5]	<10[<5]	<10[<5]	n	n	g	1	15	15		n	*	*	*	*	*	*	*	n
1	452	f	68	2	y	n	n	3	3	12	12	y	n	n	n	l	n	y	n		<10	y	n	n	tetraplegia	c	2		n	n	n	n	n	sd	30m	13	14	15	7m	multiple infarct, including bil basal gll	m	c	lt mca	moderate	c	n	n
1	453	f	63	1	y	n	n	2	2	15	15	y	n	n	n	r	y	n	n		<10	y	n	n	n	c	2		<10[3'40"]	<10[1']	n	n	n	md	28m	14	14	15	n	*	*	*	*	*	*	*	n
2	453	f	63	1	*	*	*	*	*	15	15	*	*	*	*	l	y	n	n		<10		*	*	*	c	*		n	n	n	n	n	md	*	*	*	*	*	*	*	*	*	*	*	*	n
3	453	f	63	1	*	*	*	*	*	15	15	*	*	*	*	l	n	n	y		<10		*	*	*	c	*		n	n	n	n	n	md	*	*	*	*	*	*	*	*	*	*	*	*	n
1	454	f	75	2	y	n	n	4	3+4	9	9	y	y	y[lt insula]	hydrocephalus	l	n	y	n		<10	y	n	n	lt mca large infarct	c	5		n	n	n	n	n	sd	32m	7	11	11	4d	lt mca infarct	large	c	n	n	n	n	n
1	455	f	85	2	n	y	120	0	0	15	15	n	n	n	n	l	y	n	n		<10		n	n	n	c	120		n	n	n	n	n	md	12	14	15	15	n	*	*	*	*	*	*	*	n
1	456	m	42	2	y	n	n	2	2	15	15	y	n	n	n	l	n	n	y		10=14		n	n	n	c	1		<10[32"]	<10[1'13"]	n	n	n	g	30m	15	15	15	n	*	*	*	*	*	*	*	n
1	457	m	52	1	y	n	n	3[post2nd bleeding]	3+4[post2nd bleeding]	15	10	y	n	y	n	l	n	n	y		<10		y[6d[920821] after 1st bleeding]	n	y[ventriculiyis]	c	4		<10[5'40"]	n	n	n	n	md	12m	11	15	15	14d	n	n	n	n	n	n	diffuse brain swelling	n
1	458	m	42	2	y	n	n	2	2+4	15	15	y	y	n	n	l	n	y	n		<10		n	n	mca diffuse infarct	c	1		n	n	n	n	n	sd	30m	14	14	15	17d	lt mca diffuse infarct	moderate	c	n	n	n	n	n
1	459	f	60	2	y	n	n	2	3	15	15	y	n	n	n	r	y	n	n		<10		n	n	n	c	2		<10[1']	n	n	n	n	g	29m	15	15	15	n	*	*	*	*	*	*	*	n
1	460	m	43	2	y	n	n	2	1	15	15	y	n	n	n	l	n	n	y		<10	y	n	n	n	c	4		<10	n	n	n	n	g	29m	15	15	15	n	*	*	*	*	*	*	*	n
1	461	f	39	2	y	n	n	2	3	15	15	y	n	n	n	r	y	n	n		<10		n	n	n	c[fail]	4		n	n	n	y-r-d	stop op and craniectomy	g	7	15	15	15	1	n	n	n	n	n	n	brain swelling	n
1	462	f	78	2	y	n	n	4	3+4	9	9	y	y	y[lt frotal, large]	n	r	n	n	y		<10		n	n	bifrotal encephalomalasia	c	2		y[how long]	n	n	y-d-n	temporal clip	v	4m	9	7	7	4m	bifrontal encephalomalasia	large	c	n	n	n	n	n	1. Persistent trigeminal art with basilar art hypoplasia
1	463	f	75	2	y	n	n	3	3+4	8	8	y	y	n	n	r	n	y	n		<10		n	n	n	c	2		<10[1'10"]	n	n	n	n	md	29m	13	15	15	n	*	*	*	*	*	*	*	n
1	464	m	46	2	y	n	n	2	2	15	15	y	n	n	n	r	n	n	y		<10		n	n	n	c	13		<10[6'30"]	n	n	n	n	g	27m	15	15	15	n	*	*	*	*	*	*	*	n
1	465	f	49	2	y	n	n	5	3+4	6	6	y	y	y	hydrocephalus	l	n	n	y		10=14	y	?d post1stop at outside hosp[just did removal of ich---bifrontal ich found days later	n	n	c	30		n	n	n	n	n	v	26m	6	6	6	1m	n	n	n	n	n	n	multiple brain contusion	n
1	466	m	47	2	y	n	n	3	2+4	13	13	y	n	y	n	r	n	n	y		<10	y	n	n	n	c	1		<10[30"]	n	n	n	n	g	26m	15	15	15	n	*	*	*	*	*	*	*	n
1	467	m	61	2	y	n	n	3	2	12	12	y	n	n	hydrocephalus	r	n	n	y		<10	y	n	n	acute SDH post op and re-op post op 2nd d	c	13		n	n	n	n	n	g	2m	15	15	15	n	*	*	*	*	*	*	*	n	transfer to Kaohsung chang gung hosp 1m later and clinical condition was stable
1	468	m	43	2	y	n	n	2	2	15	15	y	n	n	hydrocephalus	l	n	n	y		<10		n	n	n	c	2		n	n	n	n	n	g	25m	15	15	15	n	*	*	*	*	*	*	*	n
2	468	m	43	1	*	*	*	*	*	15	15	*	*	*	*	l	n	y	n		10=14		*	*	*	c	*		<10[2'30"]	n	n	n	n	g	*	*	*	*	*
1	470	f	58	2	y	n	n	4	2+4	6	6	y	y	y	hydrocephalus	r	n	n	y		10=14	y	n	n	seizure	c	1		<10[1-5']	<10[1-5']	<10[1-5'][totally 4times	n	n	sd	26m	4	9	10	10m	multiple small infarct, including basal gll	multiple small	clinical	n	n	n	hydrocephalus	n	seizure
1	471	f	73	2	y	n	n	5	3+4	6	3	y	y	y	n	l	n	y	n		<10	y	n	n	n	c--coagulation	1		n	n	n	y-c-n	coagulation	v	3m	6	7	?	1m	n	n	n	n	n	n	multiple intracranial hemorrhage diffuse brain swelling	n	1. R/O mycotic aneurysm 2. pyogenic lumbar spondylysis recently and just discharge from hospital 3. bleeding when clipping
1	472	f	60	2	y	n	n	4	3+4	15	8	y	n	y[rt temporal, large]	n	r	y	n	n		<10		3d post sah[before op], caused cons disturbance, and was sent to hosp and was operated on on 3rd d	n	n	c	1		n	n	n	n	n	md	25m	12	14	15	10m	rt temporal	large	c	rt basal gll	morderate	clinical	r/o hydro	n	1. usage of intraoperative angio 2. Lt hemiplegia was found post op and last thereafter
1	473	m	54	2	y	n	n	2	2	15	15	y	n	n	n	l	n	n	y		<10	y	n	n	multiple infarct	c	1		n	n	n	n	n	d	1m	3	3	3	15days	part of bil ACA teritories,genu of lt int capsule, bil putamen,and rt thalamus	mod	clinical	rt occipitaoparietal	morderate	subclinical	n	n	rt hemiparesis noted since 930204[14th day], 930205 pt's consciousness became worse and could not follow order.Furthermore, fever was found. The clinical condition deteriorated step by step
1	474	m	38	2	y	n	n	3	2+4	15	11	y	y	y	n	r	n	n	y		<10		post op 2d presenting with ICH---2nd op for ICH	post op15d presenting with huge rt frontal ICH, rt EDH, and IVH	n	c	1		10=15[10']	n	n	y-d-d	temporal clip	d	15d	3	3	3	15days	*	*	*	*	*	*	*	big residual	inadequate clipping of aneurysm--f/u angio showed upward protruding and bilobulated aneurysm which caused 2 times rebleeding after op and finally leaded to dead
1	475	f	52	2	y	n	n	3	2+4	11	11	y	y	n	hydrocephalus	l	n	n	y		<10[baby aneurysm]		n	n	cns infection	c	5		n	n	n	n	n	md	24m	10	14	15	4	lt subfrotal	moderate	subclinical	lt sutemporal	small	subclinical	n
1	476	f	62	1	y	n	n	2	2	15	15	y	n	n	n	l	n	y	n		<10	y	n	n	n	c	5		<10[20"]	<10[2'45"]	n	n	n	md	24m	14	15	15	n	*	*	*	*	*	*	*
1	478	f	49	2	y	n	n	3	3+4	11	11	y	y	y[rt temporal]	n	r	n	y	n		<10		n	n	n	c	1		n	n	n	n	n	g	23m	15	15	15	7d	n	n	n	n	n	n	n	n
1	479	m	63	1	y	n	n	5	3+4	4	5	y	y	n	hydrocephalus	r	n	n	n	y	>60		n	n	n	proximal occlusion	12		n	n	n	n	n	v	1m	4	*	*	n	*	*	*	*	*	*	*		R/O dissecting aneurysm
1	480	f	78	1	y	n	n	4	3	7	7	y	n	n	n	r	y	n	n		<10	y	n	n	n	c	8		<10[2'22"]	n	n	n	n	v	12m	7	8	9	n	*	*	*	*	*	*	*
1	481	m	35	2	n	n	n	0	0	15	15	n	n	n	mass, left sylvian	l	n	y	n		20=24		*	*	n	wrapping	*		n	n	n	n	n	g	2m	15	*	*										angio done at outlying hosp and no vascular lesion found. This is a case of thrombus aneurysm present with seizure; both hands numbness and odd smell spells off and on for years and recently about 2-3 times per month.
1	482	f	56	1	n	y[lt abducens palsy and diplopia ]	120	0	0	15	15	n	n	n	mass, lt cavernous sinus	l	y	n	n		>=30		*	*	*	trapping	120		n	n	n	n	n	g	1m	15	15	15	n	*	*	*	*	*	*	*	n	dural AVM found 6 months postop, same side,transverse-sigmoid sinuses
1	483	f	57	1	n	y[lt occlular palsy with diplopia	60	0	0	15	15	n	n	n	mass, lt cavernous sinus	l	y	n	n		>=30		*	*	*	trapping	48		n	n	n	n	n	g	3m	15	pending	pending	n	*	*	*	*	*	*	*	n
1	484	m	65	1	n	n	n	0	0	15	15	?	n	n	infarct, rt post limb of int capsule	r	y	n	n		<10		n	n	n	c	27		n	n	n	n	n	md	4m	15	15	15	n	*	*	*	*	*	*	n	n
1	485	f	44	1	y	n	n	2	2	7	7	y	n	y[lt frontal]	n		n	n	y		10=14	y	n	n	n	c	2		10=15	n	n	y-d-d	t	md	16m	15	15	15	n	*	*	*	*	*	*	*	n
1	486	f	42	1	y	n	n	1	2	15	15	y	n	n	n	l	n	y	n		<10		n	n	n	c	3		n	n	n	y-d-d	t	g		15	15	15	*	*	*	*	*	*	*	*	n
1	487	f	74	1	y	n	n	2	3+4	13	13	y	y[2]	y[bifrontal, more on left]	n	l	n	n	y		<10	y	n	n	n	c	2		15=20	n	n	y-d-d	t	g
1	488	f	67	1	y	n	n	3	3+4	11	11	y	y	y	hydrocephalus	l	n	y	n		10=14	y	n	n	n	c	2		10=15	n	n	y-r-d	t	md	4	12	15		1	lt basal ggl	s	s	n	n	n	n	n
1	489	m	67	2	y	y	10	4	2+4	8	8	y	y[4]	n	n	r	y	n	n		15=19	y	10	n	n	c	1		>20	n	n	y-c-n	clip	d	7d	3	3	3	n	*	*	*	*	*	*	n	n
1	490	f	32	1	y	n	n	2	3+4	15	15	y	y[4]	y[rt frontal, inf-lat]	n	r	n	y	n		15=19	y	n	n	n	c	4		<10	n	n	y-r-d	t	g	55	15	15	15	n	*	*	*	*	*	*	*	n
1	491	f	64	2	y	n	n	2	3+4	15	15	y	y[2,3,a,4]	n	n	r	y	n	n		10=14		n	n	n	c	1		>20[24]	<10[3]	>20[26],10=15[13],<10[4],<10[9]	y-c-n	t	v					1d	n	n	n	n	n	n	retraction hematoma[rt frontal]	n
1	492	f	68	2	n	y	7	0	0	15	15	n	n	n	n	l	y	n	n		<10		n	n	lt mca and aca large infarct	c	7		10=15[15']	<10[5']	<10[5'], <10[5']	y-d-n	c+t, hypotension	d	2m	4	3	3	3d	lt mca infarct	large	c	lt aca territory	large	c	n	n
1	494	m	63	1	n	n	n	0	0	15	15	n	n	n	n	l	n	n	y		10=14		n	n	n	c	60		n	n	n	n	n	g	2m	15	15	15	10d	lt frotal	small	s	n	n	n	n	n	H/T Hx, DM Hx
1	495	m	70	1	n	n	n	0	0	15	15	n	n	n	n	r	y	n	n		>=30		n	n	n	trapping and EC-IC bypass	*		n	n	n	n	n	g	12	15	15	15	n	*	*	*	*	*	*	n	n
1	496	m	50	1	y	n	n	1	3	15	15	y	n	n	n	l	n	y	n		10=14	y	n	n	n	c	60		n	n	n	n	n	g	1m	15	15	15	n	*	*	*	*	*	*	n	n
1	497	m	55	1	y	n	n	3	3	12	12	y	n	n	hydrocephalus	r	n	n	y		10=14	y	n	n	n	c	1		n	n	n	n	n	g	120m	15	15	15	4d	rt frontal	small	s	n	n	n	hydrocephalus	n
1	498	m	49	2	y	n	n	2	3	15	15	y	n	n	hydrocephalus	r	n	n	y		<10		n	n	n	c	2		n	n	n	n	n	g	72m	15	15	15	167d	rt frontal	small	s	n	n	n	hydrocephalus	n
1	499	m	55	1	y	n	n	3	3+4	14	11	y	y[4]	n	hydrocephalus	l	n	n	y		<10	y	n	n	n	c	3		n	n	n	n	n	g	191m	14	15	15	10d	rt basal ggl	small	s	n	n	n	hydrocephalus	n
1	500	m	53	2	y	n	n	2	1	15	15	y	n	n	n	r	y	n	n		<10		n	n	n	c	10		n	n	n	n	n	g	113m	15	15	15	60d	n	n	n	n	n	n	n	n
1	501	m	58	1	y	n	n	4	3	7	7	y	n	n	n	r	y	n	n		10=14		n	n	n	c	1		10=15[15]	n	n	1.y-d-d 2.y-c-n	clip[temporal]	d	1m	3	3	3	1d	rt ICA	large	c	n	n	n	n	n
1	502	f	62	1	n	y	14	0	0	15	15	n	n	n	n	r	y	n	n		10=14		n	n	n	c	15		n	n	n	n	n	g	26m	15	15	15	n	*	*	*	*	*	*	*	n
1	503	f	43	1	y	n	n	2	1	15	15	y	n	n	n	r	n	n	y		<10		n	n	n	c	40		n	n	n	n	n	g	2m	15	15	15	n	*	*	*	*	*	*	n	n
1	504	f	45	2	n	y	3	0	0	15	15	n	n	n	n	r	y	n	n		10=14		n	n	n	c	3		n	n	n	n	n	g	15yrs	15	15	15	4yrs	rt frontal	moderate	s	n	n	n	n	n
2[develop 4yrs post silver stone applied on rt]	504	f	49	1	y	n	n	2	2	15	15	y	n	n	n	l	y	n	n		10=14	y	n	n	n	c	10		n	n	n	n	n	g	11yrs	15	15	15	7yrs	n	n	n	n	n	n	n	n
1	505	f	66	1	n	n	n	0	0	15	15	n	n	n	n	l	n	y	n		15=19		n	n	n	c	*		<10	n	n	n	n	g	1m	15	15	15	n	*	*	*	*	*	*	n	n	non-Hodgkin's lymphoma s/p chemotherapy yrs ago without relapse
1	506	f	35	1	y	n	n	3	3	12	12	y	n	n	n	r	y	n	n		10=14		y[1st attack happened 2 wks brfore this attack]	n	bil subdural effusion	c	14		n	n	n	n	n	g	18yrs	15	15	15	20d	rt frotoparietal	moderate	c	n	n	n	n	n	bil blurred vision after SAH caused by bil vitreous hemorrhage esp on right.[Terson's syndrome] op on right eye[trans-pars-plana-vitrectomy & air-injection] VA recovered well [0.6-0.8, bil]
1	507	m	29	2	y	n	n	2	2	15	15	y	n	n	n	l	n	n	y		<10		n	n	n	c	1		<10[7'21'']	<10[6'39'']	n	n	n	g	4yrs	15	15	15	60d	n	n	n	n	n	n	n	n
1	508	m	73	1	y	n	n	2	2	15	15	y	n	n	n	r	n	y	n		10=14		n	n	n	c	3		n	n	n	n	n	g	12	15	15	15	n	*	*	*	*	*	*	n	n
1	509	m	48	1	y	n	n	2	3	15	15	y	n	n	n	l	n	y	n		<10		n	n	n	wrapping	300		n	n	n	n	n	g	4m	15	15	15	n	*	*	*	*	*	*	n	n	1.This pt received coiling in 2008-04, three days after SAH at Kaohsung CGMH. Follow-up angio done in 2008-11 revealed recurrent or residual aneurysm. The surgical finding revealedtransiparent appearance of aneurysm wall and application of clip will compromise the parent vessel due to pushing force from coil. this problem may only be solved by removing coil and then suture and secure the neck of …
1	510	f	56	1	y	n	n	2	3	15	15	y	n	n	n	r	y	n	n		<10	y	n	n	n	c	6		n	n	n	n	n	g	117m	15	15	15	n	*	*	*	*	*	*	n	n
1	511	m	31	1	y	y[rt abducens palsy]	5	2	1	15	15	y	n	n	n	r	y	n	n		<10[3-5mm]		n	n	n	c	5		n	n	n	y-d-d[between neck and distal dome, when coagulation and shrinkage of aneurysm to create a narrower neck to faciliate clipping]	suction and apply permanent	g	3m	15	15	15	n	*	*	*	*	*	*	n	n
1	567	m	65	1	y	n	n	1	2	15	15	y	n	n	infarct, rt post limb of int capsule	r	y	n	n		<10		n	n	n	c	27		n	n	n	n	n	md	12	15	15	15	n	*	*	*	*	*	*	n	n
1	591	m	36	2	y	n	n	4	3+4	8	8	y	y	n	h	l	y	n	n	n	<10	n	n	n	n	c	7	n	n	n	n	y-c-n	hypotension, temponade, and clip	d	1m	3	3	3	1d	lt MCA large infartion	complete lt MCA territory	c	n	n	n	n	n
1	592	m	78	1	n	n	n	0	0	15	15	n	n	n	n	l	n	n	y	n	<10	n	n	n	n	c	*	n	n	n	n	n	n	g	1	15	15	15	1d[multiple small ICH and SDH due to previous chr. SDH months ago.]	n	n	n	n	n	n	n	n
1	593	f	56	1	n	n	n	0	0	15	15	n	n	n	n	l	n	y	n	n	<10	n	n	n	n	c	*	n	n	n	n	n	n	g	6	15	15	15	n	n	n	n	n	n	n	n	n
1	594	m	43	2	y	n	n	4	3	3	6	y	n	n	multiple infarct	r	y	n	n	n	<10	y	n	n	n	c	2	n	n	n	n	y-r-d	hypotension, temponade, and clip	d	1m	3	3	3	1d	rt MCA	entire MCA	c	bil ACA & lt PCA	large	c	n	n
1	595	f	57	1	n	n	n	0	0	15	15	n	n	n	n	l	n	y	n	n	<10	n	n	n	n	c	*	n	n	n	n	n	n	g	12m	15	15	15	n	n	n	n	n	n	n	n	n
